1 **Maternal glucocorticoids promote offspring growth without inducing oxidative stress or**  
2 **shortening telomeres in wild red squirrels**

3

4 Ben Dantzer<sup>1,2</sup>, Freya van Kesteren<sup>1</sup>, Sarah E. Westrick<sup>1</sup>, Stan Boutin<sup>3</sup>, Andrew G. McAdam<sup>4</sup>,  
5 Jeffrey E. Lane<sup>5</sup>, Robert Gillespie<sup>6</sup>, Ariana Majer<sup>7</sup>, Mark Haussmann<sup>7</sup>, Pat Monaghan<sup>6</sup>

6

7 <sup>1</sup>Department of Psychology, University of Michigan, MI 48109 Ann Arbor, Michigan, USA

8 <sup>2</sup>Department of Ecology and Evolutionary Biology, University of Michigan, MI 48109, Ann  
9 Arbor, Michigan, USA

10 <sup>3</sup>Department of Biological Sciences, University of Alberta, Edmonton, Alberta, Canada T6G 2E9

11 <sup>4</sup>Department of Integrative Biology, University of Guelph, Guelph, Ontario, Canada N1G 2W1

12 <sup>5</sup>Department of Biology, University of Saskatchewan, Saskatoon, SK S7N 5E2, Canada

13 <sup>6</sup>Institute of Biodiversity, Animal Health and Comparative Medicine, College of Medical,  
14 Veterinary and Life Sciences, University of Glasgow, Glasgow, G12 8QQ, UK

15 <sup>7</sup>Department of Biology, Bucknell University, Lewisburg, PA, 17837, USA

16

17 \*Corresponding author: [dantzer@umich.edu](mailto:dantzer@umich.edu)

18

19 **Running title:** Maternal glucocorticoids, growth, and oxidative stress

20

21 **Summary Statement:** We show that experimental increases in glucocorticoids in breeding  
22 female North American red squirrels affects offspring postnatal growth but not levels of  
23 oxidative damage and antioxidants or telomere lengths.

24

25 **Abstract**

26 Elevations in glucocorticoid levels (GCs) in breeding females may induce adaptive shifts in  
27 offspring life histories. Offspring produced by mothers with elevated GCs may be better  
28 prepared to face harsh environments where a faster pace of life is beneficial. We examined how  
29 experimentally elevated GCs in pregnant or lactating North American red squirrels  
30 (*Tamiasciurus hudsonicus*) affected offspring postnatal growth, structural size, oxidative stress  
31 levels (two antioxidants and oxidative protein damage) in three different tissues (blood, heart,  
32 liver), and liver telomere lengths. We predicted that offspring from mothers treated with GCs  
33 would grow faster but would also have higher levels of oxidative stress and shorter telomeres,  
34 which may predict reduced longevity. Offspring from mothers treated with GCs during  
35 pregnancy were 8.3% lighter around birth but grew (in body mass) 17.0% faster than those from  
36 controls, whereas offspring from mothers treated with GCs during lactation grew 34.8% slower  
37 than those from controls and did not differ in body mass around birth. Treating mothers with  
38 GCs during pregnancy or lactation did not alter the oxidative stress levels or telomere lengths of  
39 their offspring. Fast-growing offspring from any of the treatment groups did not have higher  
40 oxidative stress levels or shorter telomere lengths, indicating that offspring that grew faster early  
41 in life did not exhibit oxidative costs after this period of growth. Our results indicate that  
42 elevations in maternal GCs may induce plasticity in offspring growth without long-term  
43 oxidative costs to the offspring that might result in a shortened lifespan.

44

45 Keywords: Developmental plasticity, Life history, Maternal effects, Stress

46

47

48

49

50

51

52

53

54

55

## 56 **Introduction**

57 Parents can have long-lasting impacts on their offspring across a diversity of taxa. These  
58 parental effects have drawn substantial interest because they suggest that parental characteristics  
59 or the parental environment itself could induce adaptive shifts in offspring traits that prepare  
60 them for specific environments (i.e., adaptive transgenerational phenotypic plasticity: Mousseau  
61 and Fox, 1998; Agrawal et al., 1999; Galloway and Etterson, 2007; Dantzer et al., 2013).  
62 Furthermore, changes in maternal hormone levels, especially glucocorticoids (GCs), are widely  
63 suspected to act as a mediator of transgenerational phenotypic plasticity in vertebrates (Love and  
64 Williams, 2008; Sheriff et al., 2017).

65 GCs are metabolic hormones released by the hypothalamic-pituitary-adrenal (HPA) axis  
66 (Sapolsky et al., 2000), in response to a variety of ecologically salient cues. In mammals, studies  
67 in laboratory animals (Barbazanges et al., 1996; Harris and Seckl, 2011), 10) and in humans  
68 (Weinstock, 2005; Lupien et al., 2009) show that elevated maternal GCs can generate stable  
69 individual differences in offspring physiology and behaviour through the transfer of maternally-  
70 derived GCs to offspring across the placenta (Barbazanges et al., 1996; Lupien et al., 2009), in  
71 milk (Zarrow et al., 1970; Casolini et al., 1997), or through changes in maternal behaviour  
72 (Herrenkohl and Whitney, 1976; Brummelte and Galea, 2010; Nephew and Bridges, 2011).  
73 Maternal GCs could also act as an internal cue for offspring to modify their own development  
74 (Nettle et al., 2013). Regardless of the pathway, there is much evidence that changes in maternal  
75 GCs mediate parental effects whose influence may even persist across generations via epigenetic  
76 mechanisms (Weaver et al., 2004).

77 Some of these changes in offspring characteristics that are caused by elevations in  
78 maternal GCs are suspected to reflect adaptive plasticity in offspring life history traits, such as  
79 modifying the trade-off between early life growth and lifespan (Monaghan and Hausmann,  
80 2015; Berghänel et al., 2017). Elevated maternal GCs may induce a “faster” life history strategy  
81 whereby offspring produced by mothers with elevated GCs grow or develop faster (Dantzer et  
82 al., 2013; Berghänel et al., 2016). Such adjustments in the “pace of life” may be adaptive, as fast  
83 postnatal growth or a quicker developmental time may be beneficial when the risk of extrinsic  
84 mortality is heightened (Reznick et al., 1990; Stearns et al., 2000), which may coincide with  
85 elevated maternal GCs. However, this increased investment in postnatal growth is expected to  
86 carry costs for offspring longevity whereby fast-growing individuals exhibit a shortened lifespan

87 (Metcalf and Monaghan, 2001; Lee et al., 2013; Lemaître et al., 2015; Monaghan and Ozanne,  
88 2018).

89 Identifying if maternal stress induces a trade-off between growth and lifespan in wild  
90 animals is needed, as any costs of increased exposure to maternal GCs may be masked by benign  
91 environmental conditions in the laboratory. Accurately documenting lifespan in wild animals  
92 remains challenging in many species, and the stochastic nature of mortality in wild animals may  
93 obscure any mechanistic costs of increased exposure to maternal GCs for offspring.  
94 Consequently, one way to examine if elevated maternal GCs induce a trade-off between growth  
95 and longevity in offspring is to examine how it affects the possible underlying mechanisms of  
96 reduced longevity or physiological correlates that may predict a shortened lifespan. The free-  
97 radical theory of aging (Beckman and Ames, 1998) provides one framework to examine the  
98 mechanisms by which maternal GCs may induce this trade-off between offspring growth and  
99 longevity. Reactive oxygen species (ROS) produced during aerobic respiration can have  
100 damaging effects on cells (Beckman and Ames, 1998; Halliwell and Gutteridge, 2015). ROS  
101 production may be elevated by increased aerobic respiration due to enhanced investment in  
102 growth or reproduction (Fletcher et al., 2012; Blount et al., 2016; Smith et al., 2016; Monaghan  
103 and Ozanne, 2018) or by increased GCs (Kotrschal et al., 2007; You et al., 2009; Costantini et  
104 al., 2011; Herborn et al., 2014). Antioxidants produced by individuals (enzymatic antioxidants  
105 such as superoxide dismutase) as well as those antioxidants from the external environment (non-  
106 enzymatic antioxidants in the diet) can lessen the impact of ROS production (Selman et al.,  
107 2012). An important type of oxidative damage occurs to the protective ends of chromosomes,  
108 called telomeres. Telomeres are the repetitive DNA sequences that occur at the ends of eukaryote  
109 chromosomes whose length is shortened during each cell division (Harley et al., 1990; Aubert  
110 and Lansdorp, 2008), and may also be reduced by the increased production of ROS (von  
111 Zglinicki, 2002; Houben et al., 2008; Reichert and Stier, 2017; Monaghan and Ozanne, 2018).  
112 Cells with a reduced telomere length become senescent, stop dividing, and undergo apoptosis  
113 unless the enzyme telomerase, or another elongation process, is produced to elongate the  
114 telomeres (Bodnar et al., 1998; Rudolph et al., 1999). Telomere length or rate of loss has been  
115 found to be predictive of the mortality risk of individuals (Cawthon et al., 2003; Hausmann et  
116 al., 2005; Bize et al., 2009; Salomons et al., 2009; Boonekamp et al., 2014; Munoz-Lorente et al.,  
117 2019), though the strength of this relationship may vary among taxa and in relation to other life

118 history traits. Furthermore, avian or mammalian species with longer lifespans have been shown  
119 to exhibit slower age-specific rates of telomere loss (Hausmann et al., 2003; Dantzer and  
120 Fletcher, 2015; Sudyka et al., 2016; Tricola et al., 2018).

121 Elevated exposure to maternal GCs may, therefore, induce a life history trade-off  
122 between offspring growth and longevity, because offspring may experience elevated oxidative  
123 damage, decreased antioxidant levels, and/or shortened telomeres, either due to oxidative stress  
124 or increased cell division associated with elevated growth (Shalev, 2012; Hausmann and  
125 Heidinger, 2015; Monaghan and Hausmann, 2015; Shalev and Belsky, 2016; Monaghan and  
126 Hausmann, 2018). Previous studies across taxa show that elevated exposure to maternal GCs  
127 can shorten telomere lengths in offspring (Entringer et al., 2011; Hausmann et al., 2012;  
128 Herborn et al., 2014; Marchetto et al., 2016) or increase their rate of attrition as they age  
129 (Hausmann and Heidinger, 2015), which could cause or be associated with a shortened lifespan.  
130 For example, experimental studies in captive and wild birds show that offspring that had  
131 exogenous GCs added to their eggs or were administered GCs during chick growth had a  
132 heightened physiological stress response, higher levels of oxidative stress, and shorter telomeres  
133 early in life (Hausmann et al., 2012; Herborn et al., 2014). Despite much interest in this topic,  
134 few studies in wild animals have examined if experimental elevations in the GCs of breeding  
135 females impact the oxidative state of offspring or explicitly tested the prediction that elevations  
136 in the GCs of breeding females increase early life growth. Additionally, few studies have tested  
137 whether elevated GCs in breeding females or fast early life growth comes at some cost by  
138 promoting oxidative stress and shortening telomeres in offspring.

139 We tested the hypothesis that elevations in maternal GCs would promote a faster life  
140 history strategy in offspring of wild North American red squirrels (*Tamiasciurus hudsonicus*).  
141 We treated females with GCs using a protocol that allowed us to increase circulating GCs within  
142 a physiologically-relevant range (van Kesteren et al., 2019). We treated females with GCs either  
143 during pregnancy or lactation to assess if the timing of exposure to maternal GCs influenced  
144 their effects on offspring. Other than for offspring growth in body mass, we did not have strong *a*  
145 *priori* expectations of how the timing of elevated maternal GCs would differentially impact  
146 offspring because elevated maternal GCs during pregnancy or lactation can impact offspring  
147 through the same pathways: direct transfer of maternal GCs to offspring across the placenta or  
148 through milk (“programming”), altering maternal behaviour, or affecting offspring behaviour

149 (see references above). However, based upon our previous study (Dantzer et al., 2013), we  
150 predicted that offspring produced by mothers treated with GCs during pregnancy would grow  
151 faster in body mass. We did not have an *a priori* expectation for how treating mothers with GCs  
152 during lactation would impact offspring growth in body mass, though results from a previous  
153 study suggested that it should reduce growth (Nephew and Bridges, 2011).

154 We measured offspring postnatal growth in body mass prior to weaning (~1 to 25 d of  
155 age) and subsequently obtained measures of oxidative stress when pups were weaned (~70 d of  
156 age). In three tissues (liver, heart muscle, and blood) collected from weaned offspring, we  
157 measured one enzymatic antioxidant (superoxide dismutase), one type of non-enzymatic  
158 antioxidant (total antioxidant capacity), and one type of oxidative damage (protein damage  
159 measured via protein carbonyls). We used multiple tissues because other studies have  
160 highlighted how experimental manipulations can have tissue-specific effects (Garratt et al.,  
161 2012). To assess the cumulative impact of elevated maternal GCs on the oxidative state of  
162 offspring and how offspring growth impacted telomere lengths, we also measured telomere  
163 lengths in DNA from the liver. We focused on liver telomere lengths because the liver is a  
164 mitotically active tissue, produces growth hormones, and previous studies have documented a  
165 reduction in telomere length with faster growth (Monaghan and Ozanne, 2018), suggesting that  
166 the liver would be a good tissue to investigate any oxidative costs of growth. Although we only  
167 measured telomere lengths in one tissue, previous studies indicate that telomere lengths  
168 measured in one somatic tissue are strongly correlated with those in others (Friedrich et al.,  
169 2000). Because our estimate of offspring growth from ~1 to 25 d of age was temporally  
170 separated from when we obtained our measures of oxidative stress and telomere lengths (when  
171 offspring were weaned [~70 d]), we were able to assess whether there were persistent or  
172 cumulative oxidative costs to fast growth.

173 We predicted that offspring from mothers treated with GCs during pregnancy would  
174 grow quicker in body mass after birth, but would experience more oxidative stress (manifested as  
175 a reduction in antioxidants and an increase in oxidative damage) and decreased telomere length,  
176 which would be a result of increased oxidative stress or increased cell division associated with  
177 faster growth. Because we have previously found that female red squirrels can ameliorate the  
178 trade-off between offspring number and growth (Dantzer et al., 2013; Westrick et al., 2019  
179 preprint), we examined if elevated maternal GCs altered the trade-off between litter size and

180 offspring growth or structural (skeletal) size. Previous studies highlight that elevated maternal  
181 GCs can impact offspring birth weight (Berghänel et al., 2017) so we also examined the  
182 treatment effects on the first measure of body mass. Because early life exposure to GCs may  
183 modify the direction and strength of the association between two variables (Careau et al., 2014;  
184 Merrill and Grindstaff, 2018), we also examined if increases in maternal GCs affected the  
185 expected negative relationship between offspring growth and oxidative stress state (Smith et al.,  
186 2016) by assessing the statistical interaction between offspring growth and maternal treatment.

187

## 188 **Materials and Methods**

### 189 *Study area & measuring offspring growth*

190 We conducted this study as a part of a long-term study of red squirrels in the Yukon,  
191 Canada that takes place on the traditional territory of the Champagne and Aishihik First Nations.  
192 Squirrels in our study population were all marked individually with unique ear tags and  
193 combinations of coloured wire threaded through the ear tags (McAdam et al., 2007). Females in  
194 our study population usually produce one litter in the spring, and rarely produce more than one  
195 litter of offspring to weaning per year (Boutin et al., 2006). Adult females were captured and  
196 handled every ~3 to 21 d to assess reproductive status through abdominal palpation and nipple  
197 condition. Pups were retrieved from the nest two times. The first nest entry occurred immediately  
198 after parturition and the second nest entry occurred when pups were approximately 25 d of age.  
199 At both nest entries, pups were briefly removed from their nest, sexed, and weighed to the  
200 nearest 0.01 g using a portable balance. At the first nest entry, we marked them uniquely by  
201 obtaining a small ear biopsy (for later paternity analyses) and then we permanently marked pups  
202 at the second nest entry with unique metal ear tags. Because offspring growth in body mass  
203 during this period of time is approximately linear (McAdam et al., 2002), we estimated offspring  
204 growth as the change in body mass from the first to second nest entry divided by the total  
205 number of days elapsed between the two measures of body mass. Red squirrels usually first  
206 emerge from their nest around 30-35 d old and are usually weaned around 70 d old, such that this  
207 period of growth from ~1-25 d of age represents a period in which offspring are only consuming  
208 milk from their mother. At the second nest entry, we measured zygomatic arch width and right  
209 hind foot length to the nearest 1 mm using digital callipers or a ruler, respectively. Because we  
210 only obtained these morphological measures at the second nest entry (when pups were ~25 d



211 old), we were not able to measure the change in offspring structural size as we did for growth.  
212 All of our procedures were approved by the Animal Care and Use Committee at the University  
213 of Michigan (PRO00007805).

#### 214 *Maternal treatments*

215 We used four separate treatment groups to assess the effects of elevated maternal GCs on  
216 offspring over four different years (2012, 2015-2017), although in 2012 we only collected  
217 growth in body mass data. Individual adult females were treated with GCs either during  
218 pregnancy or lactation (“Pregnancy GCs” and “Lactation GCs”), whereas other females were  
219 treated as controls during pregnancy or lactation (“Pregnancy Controls” or “Lactation Controls”).  
220 We increased maternal GCs either during pregnancy or lactation using an established  
221 experimental protocol (Dantzer et al., 2013; van Kesteren et al., 2019). Briefly, we treated  
222 females in the Pregnancy GCs (n = 44 total litters from 43 unique females) and Lactation GCs (n  
223 = 18 litters from 17 unique females) treatment groups with exogenous cortisol (hydrocortisone,  
224 Sigma H4001) dissolved in peanut butter and wheat germ mixture (8 g of peanut butter, 2 g of  
225 wheat germ). Females in the Pregnancy Control (n = 31 total litters from 32 unique females) or  
226 Lactation Control (n = 17 litters from 16 unique females) treatment groups were fed the same  
227 amount of peanut butter and wheat germ mixture but lacking the hydrocortisone. GC treatments  
228 were prepared by dissolving hydrocortisone in 1 mL of 100% ethanol and then 5 mL of 100%  
229 peanut oil before allowing the emulsion to sit overnight so that the ethanol could evaporate. The  
230 following morning, the hydrocortisone emulsion was thoroughly mixed with the appropriate  
231 amount of peanut butter and wheat germ, weighed out into individual dosages (~10 g each),  
232 placed into an individual container, and then frozen at -20 °C until provisioning to the treated  
233 squirrels.

234 Each day during the treatment period, we placed individual dosages into a bucket that  
235 was hung ~7-10 m off the ground on the centre of the squirrel’s territory. Squirrels defend these  
236 buckets from all other conspecifics and heterospecifics (van Kesteren et al., 2019), so we can,  
237 therefore, be confident that the squirrels that were given these treatments were consuming them.  
238 The dosage of hydrocortisone varied among some of the treatment groups but we have  
239 previously shown that either 3, 6, 8, or 12 mg of hydrocortisone per day significantly elevates  
240 baseline plasma cortisol and faecal glucocorticoid metabolite levels but within a physiologically-  
241 relevant range (Dantzer et al., 2013; van Kesteren et al., 2019). Females in the Pregnancy GCs



242 treatment group were provisioned either with 3 mg (n = 4 litters), 6 mg (n = 6 litters), 8 mg (n =  
243 26 litters), or 12 mg (9 litters) of hydrocortisone whereas females in the Lactation GCs treatment  
244 groups were provisioned either with 8 mg per day (n = 10 litters) or 12 mg per day (n = 8 litters).  
245 Although the dosage administered to females treated during pregnancy or lactation varied, we  
246 grouped those administered GCs in the same treatment group regardless of dosage (i.e.,  
247 Pregnancy GCs contained females administered 3-12 mg of hydrocortisone per day, Lactation  
248 GCs contained females administered 8 or 12 mg of hydrocortisone per day). We did this for three  
249 reasons. First, we have previously shown that females provisioned with 6, 8, or 12 mg of  
250 hydrocortisone per day did not differ in their faecal glucocorticoid metabolite levels (FGM),  
251 although there were non-significant trends where squirrels fed higher dosages of hydrocortisone  
252 had higher FGM (van Kesteren et al., 2019). Second, in preliminary analyses of the data  
253 presented here and in a previous study (Dantzer et al., 2013), we found that the effects of  
254 different GC dosages (3, 6, 8, and 12 mg per day) that were provided to pregnant females on  
255 offspring growth were in the same direction (increased postnatal growth: Table S1). For females  
256 treated with Lactation GCs (8 or 12 mg per day), we also found that the effects on offspring  
257 growth were in the same direction (decreased postnatal growth: Table S1). Finally, our sample  
258 sizes in some of the treatment groups (3 and 6 mg per day in the Pregnancy GCs treatment  
259 group) were too small to assess whether there were statistical differences among the different  
260 dosage groups.

261 We aimed to treat females in the pregnancy treatments from approximately 20 d after  
262 conception until 5 d after birth (or 20-40 d post-conception as red squirrels on average have a  
263 ~35 d gestation period), whereas we actually treated females in the pregnancy GCs treatment  
264 group from  $24.2 \pm 0.9$  d (mean  $\pm$  SE) to  $39.0 \pm 0.6$  d post-conception (mean  $\pm$  SE treatment  
265 duration:  $14.9 \pm 0.8$  d) and females in the pregnancy control treatment group from  $20.4 \pm 0.8$  d  
266 to  $38.6 \pm 0.5$  d (treatment duration:  $18.2 \pm 0.8$  d). We aimed to treat females in the lactation  
267 treatments from approximately 5 d after parturition until 15 d post-parturition, whereas we  
268 actually treated females in the Lactation GCs treatment group from  $5.4 \pm 0.5$  d (mean  $\pm$  SE) to  
269  $14.5 \pm 0.6$  d post-conception (mean  $\pm$  SE treatment duration:  $9.1 \pm 0.1$  d) and females in the  
270 Lactation Control treatment group from  $4.9 \pm 0.4$  d to  $14.1 \pm 0.5$  d (treatment duration:  $9.2 \pm 0.5$   
271 d). Given a ~35 d gestation period and a ~70 d lactation period in this population, our pregnancy  
272 treatments corresponded to treating females during the last trimester of gestation and into the

273 first few days of lactation, whereas our lactation treatments corresponded to early lactation  
274 before offspring begin to feed independently (they typically leave the nest on their own for the  
275 first time at ~35 d). Note that this means that the lactation treatments occurred during a time  
276 when the offspring would not be able to consume any of the treatments themselves so any effects  
277 on offspring were likely due to the maternal phenotype.

278 Some females in the Pregnancy GCs (n = 3 litters) or Pregnancy Control (n = 2 litters)  
279 treatment groups aborted their litters prior to the first nest entry (no females in the lactation  
280 treatments aborted their litters prior to the first nest entry). Some females lost their litters (likely  
281 due to nest predation: Studd et al., 2015) after the first nest entry but before the second nest entry  
282 when we could obtain the second measure of pup body mass to estimate their growth and the  
283 only measures of offspring morphology, thereby reducing our sample sizes to estimate the  
284 treatment effects on the first measure of offspring body mass, postnatal growth and body size  
285 (sample sizes shown in Tables 2-4, S1-S5). Below we show that there was no evidence that the  
286 treatments had differential effects on litter survival from the first to second nest entry (see  
287 Results).

#### 288 *Tissue sample collection*

289 Pups are weaned when they are approximately ~70 d of age and generally stay on their  
290 natal territory until dispersal soon after (Larsen and Boutin, 1994). When juvenile squirrels were  
291 ~70 d of age, they were euthanized and tissues (liver and cardiac muscle) were immediately  
292 removed, rinsed with PBS buffer, snap frozen on dry ice, and then stored in liquid nitrogen or in  
293 a -80 °C freezer until analysis. Trunk blood was collected through decapitation and then  
294 centrifuged at 10,000 g for 10 min at room temperature to separate plasma and red blood cells.

#### 295 *Haematocrit*

296 We measured packed red blood cell volume (haematocrit) as a measure of body condition  
297 as some (though not all) previous studies have found that higher haematocrit levels correspond to  
298 better body condition or improved reproductive performance, at least in some studies of wild  
299 birds (Breuner et al., 2013; Minias, 2015; Fronstin et al., 2016). Before pups were euthanized, we  
300 collected a blood sample from the hind nail into a heparinized capillary tube. Haematocrit was  
301 quantified using a micro-capillary reader after centrifuging blood samples at 10,000 g for 10 min  
302 at room temperature.

#### 303 *Protein carbonyls*

304 We measured oxidative damage to proteins (Monaghan et al., 2009) using the protein  
305 carbonyl colorimetric kit by Cayman Chemical (Ann Arbor, USA). Briefly, ~200 mg of cardiac  
306 muscle or liver were homogenized in ~1000  $\mu$ L of 50mM MES buffer containing 1mM EDTA  
307 using a sonicator, and then centrifuged at 10,000 g for 15 min at 4 °C. The protein concentration  
308 of tissue homogenate supernatant and plasma samples was measured prior to the assay using a  
309 Biotek Take3 protocol (Biotek, Vermont, USA) and samples were diluted in PBS buffer to give a  
310 protein range between 1-10 mg/ml, as recommended by the manufacturer. The average intra-  
311 assay CV for samples for plasma, heart, or liver were 1.2%, 2.8%, and 1.6%, respectively. Inter-  
312 assay CVs for a red squirrel pooled sample run on repeat assays for plasma (n = 7 assays), heart  
313 (n = 6), or liver (n = 7) were 3.5%, 9.0%, and 8.3%, respectively. We also ran a positive control  
314 (oxidized bovine serum albumin) in two different assays and the inter-assay CV was 3.1%.

#### 315 *Superoxide dismutase*

316 We obtained one measure of the levels of enzymatic antioxidants (Monaghan et al., 2009)  
317 by quantifying levels of superoxide dismutase (SOD) using the SOD kit from Cayman Chemical.  
318 SOD was expressed as units/mg/ml protein (quantified using a Biotek Take3 protocol). Red  
319 blood cells were lysed as per the manufacturer's protocol. The average intra-assay CV for  
320 samples for RBCs, heart, or liver were 2.3%, 4.7%, and 3.1%, respectively. Inter-assay CVs for a  
321 red squirrel pooled sample run on repeat assays for RBCs (n = 10 assays), heart (n = 2), or liver  
322 (n = 4) were 16.9%, 4.6%, and 6.5%, respectively.

#### 323 *Total antioxidant capacity*

324 We obtained one measure of the levels of non-enzymatic antioxidants (Monaghan et al.,  
325 2009) by quantifying total antioxidant capacity (TAC) using the TAC kit from Cayman  
326 Chemical. Plasma was diluted in assay buffer and assayed according to the manufacturer's  
327 protocol. Liver and cardiac muscle (~47 mg) were separately homogenized in 250  $\mu$ L PBS using  
328 a sonicator and the supernatant was diluted in assay buffer and used in the assay. The average  
329 intra-assay CVs for samples for plasma, heart, or liver were 4.7%, 3.2%, and 4.7%, respectively.  
330 The inter-assay CVs for standards run on all the plates for plasma (n = 5 assays) was 15.8%  
331 whereas the inter-assay CV for a red squirrel pooled sample run on repeat for heart (n = 8) or  
332 liver (n = 2) were 15.4% and 5.4%, respectively.

#### 333 *Telomeres*

334 Liver telomere lengths were measured using the telomere restriction fragment (TRF)

335 assay following established methods (Hausmann and Mauck, 2008). Briefly, 2 to 10 g slices of  
336 liver tissue were homogenized in cell lysis solution and proteinase K (Qiagen, Germantown,  
337 USA). DNA was extracted from the liver homogenates and resuspended in buffer. The  
338 resuspended DNA was restriction digested with 15 U of *Hinf*I, 75U of *Hae*III and 40U of *Rsa*I  
339 (New England BioLabs, Ipswich, USA) at 37 °C. DNA was then separated using pulsed field  
340 electrophoresis at 14°C for 19 hours followed by in-gel hybridization overnight at 37° C with a  
341 radioactively labeled telomere-specific oligo (CCCTAA)<sub>4</sub>. Hybridized gels were placed on a  
342 phosphorscreen (Amersham Biosciences, Buckinghamshire, UK), which was scanned on a  
343 Typhoon Imager (Amersham Biosciences). Densitometry in ImageJ (v. 1.51s) was used to  
344 determine the position and the strength of the radioactive signal in each of the lanes compared  
345 with the molecular marker (Quick-Load1 kb DNA Extend DNA Ladder; New England BioLabs)  
346 to calculate telomere lengths for each sample. Inter-gel variation was accounted for by  
347 calculating the mean TRF length of standard samples run on each gel.

#### 348 *Statistical analyses*

349 We assessed the effects of maternal treatments on litter survival from the first to second  
350 nest entry (proportion of pups present at both first and second nest entries) and litter size and  
351 litter sex ratio (proportion of litter composed of males) as recorded at the first and second nest  
352 entry using generalized linear mixed-effects models (GLMMs: litter survival and litter sex ratio,  
353 using binomial errors) or a linear mixed-effect model (LMM: litter size). Each of these separate  
354 models contained maternal treatment, birth date, and year as fixed effects. Models for lactation  
355 and pregnancy treatments were run separately. There was one litter from a Pregnancy Control  
356 treatment female where her litter size at the second nest entry was greater than the at the first,  
357 likely because we missed a pup in the nest at the first nest entry, and we therefore excluded this  
358 litter from our analyses of the effects of the treatments on litter survival, litter size, and litter sex  
359 ratio. We confirmed that none of the GLMMs were overdispersed as all dispersion parameters  
360 were <1.

361 We assessed the effects of maternal treatments on offspring body mass at the first nest  
362 entry soon after parturition (birth mass), growth in postnatal body mass, and a single measure of  
363 size using separate LMMs for pregnancy and lactation treatments. Each of the six LMMs (one  
364 model for birth mass, one model for growth, and one model for size for pregnancy treatments;

365 one model for birth mass, one model for growth, and one model for size for lactation treatments)  
366 included a fixed effect for maternal treatment and covariates (sex, year [categorical variable],  
367 birth date, litter size) that could impact offspring birth mass, growth, or size. We included a two-  
368 way interaction term between treatment and litter size to identify if elevations in maternal GCs  
369 altered the trade-off between litter size and offspring birth mass, growth, or size, as shown  
370 previously for offspring growth (Dantzer et al., 2013). We included a two-way interaction  
371 between treatment and sex to assess if the treatments had sex-specific effects on birth mass,  
372 growth, and size, as documented in other species (Dantzer et al., 2019). In our model for the  
373 effects of the treatments on offspring birth mass, we included a fixed effect for age of the pups to  
374 control for the impact of age on body mass. We used a principal component analysis (PCA)  
375 using a covariance matrix in the R package *ade4* (version 1.7-13, Dray and Dufour, 2007) to  
376 generate a composite score of offspring size. The first principal component axis (PC1, hereafter  
377 “size”) explained 69.9% of the variation in offspring size as measured by zygomatic arch width  
378 and hind foot length. Both zygomatic arch width (0.71) and hind foot length (0.71) loaded  
379 positively on PC1, indicating that larger PC1 scores corresponded to offspring with longer hind  
380 feet and wider crania.

381 Oxidative stress reflects an imbalance between antioxidants and the production of ROS  
382 that can damage proteins, lipids, or DNA (Monaghan et al., 2009). Consequently, the effects of  
383 our treatments on measures of antioxidants should not be viewed in absence of their effects on  
384 our measures of oxidative damage (Costantini and Verhulst, 2009). We used a PCA to create a  
385 composite variable that reflected the oxidative state of an offspring. The PCA was composed of  
386 the two antioxidants (SOD, TAC) and one measure of oxidative damage (PCC). We conducted a  
387 separate PCA (using a correlation matrix) for each tissue type using the package *ade4*. For some  
388 individuals, we were missing measures of TAC (heart: n = 3; plasma: n = 2) or PCC (heart: n =  
389 2; plasma: n = 4) so we substituted average values for the PCA.

390 Low scores for Blood PC2, Heart PC2, or Liver PC1 corresponded to squirrels that were  
391 exhibiting oxidative stress as they represented lower levels of the two antioxidants (SOD, TAC)  
392 for blood and liver tissue or just one antioxidant (SOD) for heart tissue and, for heart tissue,  
393 higher levels of protein damage (PCC, Table 1). We used these composite variables describing  
394 oxidative state of each tissue, haematocrit, or telomere length as the response variables in  
395 separate LMMs. Each of these LMMs contained a fixed effect for maternal treatment and

396 offspring sex, year [categorical variable], birth date, and litter size. Because offspring growth  
397 may impact oxidative stress levels or telomere lengths (Monaghan and Ozanne, 2018), we  
398 included a two-way interaction term between treatment and offspring growth to examine if  
399 mothers with elevated maternal GCs exhibited an altered relationship between growth and the  
400 response variable (Careau et al., 2014; Merrill and Grindstaff, 2018). Due to smaller sample sizes  
401 for these variables, we did not include an interaction between sex and treatment. In the model to  
402 assess treatment effects on telomere lengths, we also included a fixed effect for the oxidative  
403 stress levels in the liver (Liver PC1).

404 All analyses were conducted in R (version 3.5.2, R Development Core Team, 2013) using  
405 lme4 (version 1.1-18-1, Bates et al., 2015) and *P*-values for fixed effects were estimated using  
406 lmerTest (version 3.0-1, Kuznetsova et al., 2017). Continuous predictor variables were  
407 standardized (mean of 0, SD of 1) with birth date, litter size, and growth being standardized  
408 within each grid-year-treatment combination. Assumptions of homoscedasticity, normality of  
409 residuals for our LMMs, and a lack of high leverage observations were confirmed using  
410 diagnostic plots (Zuur et al., 2010). As we only had one estimate of birth mass, growth, size,  
411 oxidative stress, or telomere lengths per individual pup, we did not include random intercept  
412 terms for individual identity in any of the models described above. Whenever we had repeated  
413 observations of the same litter (e.g., multiple estimates of offspring growth from different pups  
414 within the same litter), we included a random intercept term for litter identity. However, we did  
415 not include a random intercept in some models (shown in electronic supplementary materials)  
416 due to model convergence issues that were likely the result of having only a few observations of  
417 multiple pups being measured within one litter or for having a relatively small number of litters.  
418 As we had few observations of the same females across years for most of our response variables  
419 (sample sizes shown above), we did not include a random intercept for maternal identity as this  
420 was usually redundant with litter identity. Random effects were not included in our models of the  
421 effects of the treatments on litter characteristics (survival, size, sex ratio) as we only had a few  
422 females observed across multiple years. We estimated variance inflation factors (VIFs) from our  
423 models to assess multicollinearity among the predictor variables (Zuur et al., 2010) and VIFs  
424 indicated that multicollinearity was not an issue in these models (all VIF < 3 except if included  
425 in an interaction or a multi-level categorical variable).

426



## 427 **Results**

### 428 *Effects of treatments on litter survival, litter size, & litter sex ratio*

429 There was no evidence that treating mothers with GCs during pregnancy or lactation  
430 caused litter failure or altered litter size or litter sex ratio compared to the controls. For those  
431 mothers producing offspring until at least the first nest entry (occurring soon after pups were  
432 born), the proportion of the litter that survived from the first to the second nest entry did not  
433 differ between mothers treated with GCs during pregnancy (n = 42 litters, 53.8 ± 7% of total  
434 pups survived from the first to second nest entry) and the pregnancy (time-matched) controls (n  
435 = 29 litters, 63 ± 8%,  $z = -0.66$ ,  $P = 0.51$ ), nor between mothers treated with GCs during lactation  
436 (n = 18 litters, 79.6 ± 8% pups survived) and the lactation (time-matched) controls (n = 17 litters,  
437 72.6 ± 9.5% pups survived,  $z = -0.63$ ,  $P = 0.53$ ).

438 Litter size did not differ between mothers treated with GCs during pregnancy or the  
439 controls at the first nest entry (Pregnancy GCs: n = 42 litters, 3.07 ± 0.14 pups, range = 1-5 pups;  
440 Pregnancy Controls: n = 31 litters, 2.9 ± 0.17 pups, range = 1-5 pups, effect of treatment,  $t_{52} = -$   
441 0.19,  $P = 0.85$ ) nor at the second nest entry (Pregnancy GCs: n = 23 litters, 2.75 ± 0.24 pups,  
442 range = 1-5 pups; Pregnancy Controls: n = 20 litters, 2.70 ± 0.16 pups, range = 1-4 pups, effect  
443 of treatment,  $t_{37} = 0.11$ ,  $P = 0.92$ ). Litter size also did not differ between mothers treated with  
444 GCs during lactation or the controls at the first nest entry (Lactation GCs: n = 18 litters, 2.67 ±  
445 0.2 pups, range = 1-4 pups; Lactation Controls: n = 17 litters, 2.94 ± 0.13 pups, range = 2-4 pups,  
446 effect of treatment,  $t_{30} = -1.11$ ,  $P = 0.27$ ), nor at the second nest entry (Lactation GCs: n = 16  
447 litters, 2.25 ± 0.2 pups, range = 1-3 pups; Lactation Controls: n = 14 litters, 2.57 ± 0.2 pups,  
448 range = 1-4 pup, effect of treatment,  $t_{25} = -1.31$ ,  $P = 0.20$ ).

449 The litter sex ratio (proportion of males) at the first nest entry did not differ between  
450 mothers treated with GCs during pregnancy or the controls (Pregnancy GCs: n = 42 litters, 53 ±  
451 4% males; Pregnancy Controls: n = 29 litters, 40.9 ± 5% males, effect of treatment:  $z = 0.57$ ,  $P =$   
452 0.57), nor at the second nest entry (Pregnancy GCs: n = 23 litters, 59.3 ± 7% males; Pregnancy  
453 Controls: n = 19 litters, 46.5 ± 7% males, effect of treatment:  $z = 0.26$ ,  $P = 0.80$ ). Similarly, the  
454 litter sex ratio at the first nest entry did not differ between mothers treated with GCs during  
455 lactation or the controls (Lactation GCs: n = 18 litters, 52.8 ± 7.2% males; Lactation Controls: n  
456 = 17 litters, 53.4 ± 7.9% males, effect of treatment:  $z = 0.09$ ,  $P = 0.92$ ) nor at the second nest



457 entry (Lactation GCs:  $n = 16$  litters,  $58.3 \pm 8.7\%$  males; Lactation Controls:  $n = 14$  litters,  $64.9 \pm$   
458  $9.3\%$  males, effect of treatment:  $z = -0.27$ ,  $P = 0.79$ ).

459 *Effects of treating pregnant females with GCs on offspring growth, oxidative stress, and telomere*  
460 *lengths*

461 Offspring from mothers treated with GCs during pregnancy grew  $17.0\%$  faster ( $t_{41.4} =$   
462  $3.07$ ,  $P = 0.004$ , Table 2A, Fig. 1A) but were not larger in structural size (Table 2B, Fig. 1C),  
463 and did not differ in body condition (as reflected in their haematocrit levels: Table S2A) than  
464 those produced by control mothers. After correcting for the effects of age on the first body mass  
465 we recorded when pups were first weighed (“birth mass”) as well as other variables (Table 3A),  
466 offspring from mothers treated with GCs during pregnancy were  $8.3\%$  smaller than those from  
467 control mothers ( $t_{59.8} = -2.51$ ,  $P = 0.015$ , Table 3A), suggesting that these pups exhibited catch-  
468 up growth after being born at a smaller body mass. There was no indication that the treatments  
469 had sex-specific effects on offspring growth or size (Table 2). There was also no indication of a  
470 trade-off between litter size and offspring growth or size during the years that we studied (Table  
471 2) nor was there any evidence that treating mothers with GCs during pregnancy altered the  
472 relationship between litter size and growth rate, as indicated by the lack of significant  
473 interactions between treatment and litter size for offspring growth and size (Table 2). Because  
474 the treatments had no significant effects on litter size or litter sex ratio (see above), the effects of  
475 the treatments on offspring growth were not simply due to a reduction in litter size.

476 Offspring from mothers treated with GCs during pregnancy did not have higher oxidative  
477 stress levels in the blood, liver, or heart (Table S3, Fig. 2) and they also did not have shorter  
478 telomere lengths (Table S4, Fig. 3). Offspring from mothers treated with GCs during pregnancy  
479 or provided with supplemental food during pregnancy (controls) that grew faster did not have  
480 higher oxidative stress levels in blood, heart, or liver nor did they have shorter telomere lengths  
481 (Tables S3-S4). There was no indication that growth or its interaction with maternal treatment  
482 impacted oxidative stress levels (Table S3) or liver telomere lengths (Table S4) in offspring from  
483 females treated during pregnancy.

484 *Effects of treating lactating females with GCs on offspring growth, oxidative stress, and telomere*  
485 *lengths*

486 Offspring from mothers treated with GCs during lactation grew  $34.8\%$  slower ( $t_{27} = -$   
487  $2.08$ ,  $P = 0.047$ , Table 4A, Fig. 1B), but were not significantly smaller in structural size (Table

488 4B, Fig. 1D), and did not differ in body condition (as reflected in haematocrit levels: Table S2B)  
489 or first body mass (Table 3B) from those of pups from control mothers. There was no indication  
490 that the treatments had sex-specific effects on offspring growth or size, as reflected in the lack of  
491 significant sex by treatment interactions (Table S4). There was also no indication of a trade-off  
492 between litter size and offspring growth or size (Table S4) and no evidence that treating females  
493 with GCs during lactation altered the relationship between litter size and growth rate, as  
494 indicated by the lack of significant interactions between treatment and litter size for offspring  
495 growth and size (Table S4). Because the treatments had no significant effects on litter size or  
496 litter sex ratio (see above), the effects of the treatments on offspring growth were not simply due  
497 to an increase in litter size.

498       Offspring from mothers treated with GCs during lactation did not have higher oxidative  
499 stress levels than those from control mothers in any of the three tissues (blood, heart, liver: Table  
500 S5, Fig. 2B, 2D, 2F) and they also did not have shorter telomere lengths (Table S4, Fig. 3B).  
501 Offspring from mothers treated with GCs during lactation or provided with supplemental food  
502 during lactation (controls) that grew faster did not have higher oxidative stress levels in blood,  
503 heart, or liver nor did they have shorter telomere lengths (Table S4). There was also no  
504 indication that growth or its interaction with maternal treatment impacted oxidative stress levels  
505 (Table S5) or liver telomere lengths (Table S4) in offspring from females treated during  
506 lactation.

507

## 508 **Discussion**

509       Mothers treated with GCs during pregnancy produced offspring that were lighter around  
510 birth but then exhibited significantly faster postnatal growth prior to weaning, whereas mothers  
511 treated with GCs during lactation tended to produce slower growing offspring that were of  
512 similar mass at birth. There were no treatment effects on offspring structural size, indicating that  
513 while offspring from mothers treated with GCs gained mass at a different rate than the controls,  
514 the treatments did not influence skeletal size. However, we only obtained one measure of  
515 structural size when offspring were ~25 d of age, and therefore did not quantify any treatment  
516 effects in the rate of change in structural size as we did for body mass. Our results differ from a  
517 recent literature analysis across mammals showing that offspring from mothers experiencing late  
518 gestational stress grew more slowly before weaning (Berghänel et al., 2017). One explanation for

519 the difference between this previous literature analysis and our results is that elevated GCs  
520 simply modulated the trade-off between offspring quantity and quality (e.g., producing small  
521 litters of fast-growing offspring) or ameliorated the trade-off between offspring quantity and  
522 quality (e.g., lessening the effect of increased litter size on the growth rate of each individual  
523 offspring: Stearns, 1992). However, this is unlikely because we found no treatment effects on  
524 litter size nor on the trade-off between litter size and growth rate. Thus, somehow females treated  
525 with GCs during pregnancy produced fast growing offspring without merely reducing their litter  
526 sizes, though it is notable that in the years in which we conducted this study, we also did not  
527 document a trade-off between litter size and offspring growth in any of the GC-treated or control  
528 females, as we have found previously (Dantzer et al., 2013). It is possible that we did not find  
529 evidence of a trade-off between litter size and offspring growth in the present study because both  
530 the GC-treated and control females were fed supplemental food and a previous study showed that  
531 *ad libitum* food-supplementation ameliorates this trade-off in red squirrels (Dantzer et al., 2013).  
532 GCs are metabolic hormones that have well-known effects on partitioning resources dedicated to  
533 survival vs. reproduction within-individuals (Wingfield et al., 1998). Here, it is possible that GCs  
534 also play a role in the partitioning of resources between mothers and offspring where they  
535 increase investment in offspring (increasing postnatal growth rates without a reduction in litter  
536 size) perhaps at the expense of maternal energy stores.

537 We did not find support for the hypothesis that elevated maternal GCs during pregnancy  
538 or lactation or increased offspring growth caused an elevation in oxidative stress levels or  
539 shortened telomere lengths in offspring. This differs from previous studies that have found that  
540 offspring growth is positively correlated with oxidative stress levels or inversely correlated with  
541 offspring telomere lengths (Hausmann and Heidinger, 2015; Monaghan and Hausmann, 2015;  
542 Monaghan and Ozanne, 2018). This is surprising and requires explanation. First, we measured  
543 oxidative stress levels in offspring when they were weaned (~70 d of age) whereas we treated  
544 their mothers with GCs either during pregnancy or early lactation. Thus, it is possible that the  
545 offspring in our study experienced elevated oxidative stress levels but these effects had  
546 disappeared by weaning. A second possibility is an artefact associated with selective  
547 disappearance of poor-quality individuals from those mothers treated with GCs during  
548 pregnancy, such as slow growing individuals with short telomeres dying before we could obtain  
549 our measures of oxidative stress and telomere lengths. This is unlikely as we observed no

550 treatment effects on litter size or the reduction in litter size from the first to second nest entry.  
551 Finally, the fact that mothers treated with GCs did not produce offspring with elevated oxidative  
552 stress levels or shorter telomeres may have been because of the effects of maternally-derived  
553 GCs on offspring telomerase levels, an enzyme that is capable of rebuilding telomeres or  
554 buffering them from attrition (Blackburn, 2005). We did not measure telomerase levels, but a  
555 previous study showed that long-term exposure of laboratory rats to unpredictable stressors  
556 increased the production of telomerase (Beery et al., 2012). Thus, a testable prediction for future  
557 studies is that treating mothers with GCs promotes increases in telomerase or enzymatic  
558 antioxidant production that has protective effects on offspring. This would be consistent with  
559 predictions from the oxidative shielding hypothesis (Blount et al., 2016) that proposes that  
560 females may reduce their own levels of oxidative damage (perhaps by upregulation of enzymatic  
561 antioxidants) to mitigate their detrimental influence on offspring.

562 Our results indicate that elevated GCs can impact maternal investment in the current  
563 litter. Females experiencing elevated GCs during pregnancy increased their investment in the  
564 current litter (as indicated by an increase in postnatal growth) whereas females experiencing  
565 elevated GCs during lactation tended to reduce their investment in the current litter, the latter  
566 possibly being because mothers spent less time interacting or nursing their offspring, as in a  
567 previous study in laboratory rats (Nephew and Bridges, 2011). Alternatively, the reduction in  
568 offspring growth when mothers were treated with GCs during lactation could have been because  
569 milk quality or content was altered. Life history theory predicts that such changes in maternal  
570 investment in offspring could alter the survival or future reproduction of mothers (Stearns, 1992)  
571 or increase their oxidative stress levels (Monaghan and Hausmann, 2006; Blount et al., 2016).  
572 However, our previous work in red squirrels shows that their food caching nature results in  
573 unexpected patterns with respect to the potential costs of reproductive investment. Red squirrels  
574 can elevate reproductive output (i.e., producing a second litter or larger litters) in anticipation of  
575 increased future food abundance (Boutin et al., 2006), or produce faster growing offspring when  
576 the fitness payoffs warrant increased investment in the current litter (Dantzer et al., 2013). They  
577 seem to be able to do this without additional access to food except the food that they already  
578 have stored from the previous autumn (Humphries and Boutin, 2000; Boutin et al., 2006;  
579 Dantzer et al., 2013). Thus far, survival costs for this increased reproductive investment in the  
580 current litter exhibited by female red squirrels seem to be small or absent. Female red squirrels

581 with increased reproductive effort do expend more energy (Humphries and Boutin, 2000;  
582 Fletcher et al., 2012) and experience increased oxidative protein damage (Fletcher et al., 2012)  
583 but we have not yet documented substantive survival costs for females that increase their  
584 reproductive output (Humphries and Boutin, 2000; Descamps et al., 2009). We have not yet  
585 quantified any oxidative or survival costs to mothers who were treated with GCs during  
586 pregnancy and who on average produced faster growing offspring. Unless females upregulate the  
587 production of protective enzymatic antioxidants or telomerase (Blount et al., 2016), it seems  
588 likely that females with elevated GCs would experience increased oxidative damage due to their  
589 elevated reproductive investment, or because of the elevated levels of GCs that they experience.  
590 For example, previous studies in red squirrels (Fletcher et al., 2012) and other species (Blount et  
591 al., 2016) highlight that increased reproductive investment or increased exposure to GCs  
592 (Kotrschal et al., 2007; You et al., 2009; Costantini et al., 2011) may elevate oxidative damage in  
593 breeding females with elevated GCs during reproduction.

594         Although it is not known whether increased antioxidants, reduced oxidative damage, or  
595 elongated telomeres actually cause an increase in longevity (Simons, 2015; but see Munoz-  
596 Lorente et al. 2019), our results suggest that fast growing offspring or those from mothers treated  
597 with GCs during pregnancy or lactation would not experience a reduction in lifespan. Our results  
598 and our previous study in red squirrels (Dantzer et al., 2013) show that maternal GCs during  
599 pregnancy or lactation can induce plasticity in offspring growth and that this plasticity should be  
600 adaptive for the fluctuating environments experienced by Yukon red squirrels (Dantzer et al.,  
601 2013). Specifically, when population density is elevated, females have elevated GCs and fast  
602 offspring growth increases offspring survival (Dantzer et al., 2013). We have shown here that  
603 females with elevated GCs during pregnancy produce faster growing offspring, whereas females  
604 with elevated GCs during lactation produce slower growing offspring. This suggests that  
605 plasticity in GC levels during female reproduction (e.g., females have elevated GCs during  
606 pregnancy but exert strong negative feedback on further GC production during lactation) would  
607 maximize female reproductive success when density is high. However, we did not find support  
608 for the hypothesis that elevated maternal GCs induce a faster pace of life where offspring grow  
609 faster and are more competitive early in life but this comes at some oxidative cost that may  
610 predict a shortened lifespan. Future studies should assess oxidative stress using an even broader  
611 array of measures than the few measures we used here, and will of course need to assess if

612 elevated maternal GCs actually impact offspring lifespan. Our results to date indicate that the  
613 increases in maternal GCs during pregnancy in response to population density result in an  
614 adaptive maternal effect on offspring postnatal growth and do not pose a developmental  
615 constraint on offspring postnatal growth.

616

617 **Acknowledgements:** We thank the Champagne and Aishihik First Nations and Agnes  
618 MacDonald for allowing us to study squirrels on their traditional territory. Special thanks to the  
619 field technicians that helped collect these data, especially to Monica Cooper, Stacie Evans, Zach  
620 Fogel, Claire Hoffmann, Noah Israel, Sean Konkolics, Laura Porter, Matt Sehrsweeney, Sam  
621 Sonnega, and Jess Steketee. This is publication 105 of the Kluane Red Squirrel Project.

622

623 **Competing Interests:** None

624

625 **Funding:** Research was supported by the National Science Foundation to B.D. (1749627) and to  
626 B.D. and A.G.M. (1110436) as well as funds from the University of Michigan to B.D. The  
627 Kluane Red Squirrel Project is supported by the Natural Sciences and Engineering Research  
628 Council of Canada to S.B., A.G.M., and J.E.L.

629

630 **Data Availability:** All data files are available on FigShare from the first author  
631 (<https://figshare.com/account/home#/projects/71585>). All other requests for data or analysis code  
632 will be fulfilled by the first author.

633

634

635 **References**

- 636 Agrawal AG, Laforsch C, Tollrian R. 1999. Transgenerational induction of defences in animals  
637 and plants. *Nature* 401:60-63.
- 638 Aubert G, Lansdorp PM. 2008. Telomeres and aging. *Physiol Rev* 88, 557-579.
- 639 Barbazanges A, Piazza PV, Le Moal M, Maccari S. 1996. Maternal glucocorticoid secretion  
640 mediates long-term effects of prenatal stress. *J Neurosci* 16:3943-3949.
- 641 Bates, D., Mächler, M., Bolker, B., & Walker, S. (2015). Fitting linear mixed-effects models  
642 using lme4. *J Stat Softw*, 67(1). <http://doi.org/10.18637/jss.v067.i01>
- 643 Beckman KB, Ames BN. 1998. The free radical theory of aging matures. *Physiol Rev*  
644 78:547-581.
- 645 Beery AK, Lin J, Biddle JS, Francis DD, Blackburn EH, Epel ES. 2012. Chronic stress  
646 elevates telomerase activity in rats. *Biol Lett* 8, 1063-1066.
- 647 Berghänel, A, Heistermann, M, Schülke, O, Ostner J. 2016. Prenatal stress effects in a wild,  
648 long-lived primate: predictive adaptive responses in an unpredictable environment. *Proc*  
649 *R Soc B* 283, 20161304.
- 650 Berghänel, A, Heistermann, M, Schülke, O, Ostner J. 2017. Prenatal stress accelerates  
651 offspring growth to compensate for reduced maternal investment across mammals. *PNAS*  
652 114, E10658-E10666.
- 653 Bize P, Criscuolo F, Metcalfe NB, Nasir L, Monaghan P. 2009. Telomere dynamics rather  
654 than age predict life expectancy in the wild. *Proc Roy Soc B* 276, 1679-1683.
- 655 Blackburn, EH. 2005. Telomeres and telomerase: their mechanisms of action and the effects  
656 of altering their functions. *FEBS Letters* 7, 859-862.
- 657 Blount JD, Vitikainen EIK, Stott I, Cant MA. 2016. Oxidative shielding and the cost of  
658 reproduction. *Biol Rev* 91, 483-497.



- 659 Bodnar AG, Ouellette M, Frolkis M, Holt SE, Chiu CP, Morin GB, Harley CB, Shay JW,  
660 Lichtsteiner S, Wright WE. 1998. Extension of life-span by introduction of telomerase  
661 into normal human cells. *Science* 279, 349-352.
- 662 Boonekamp JJ, Mulder GA, Salomons HM, Dijkstra C, Verhulst S. 2014. Nestling telomere  
663 shortening, but not telomere length, reflects telomere developmental stress and predicts  
664 survival in wild birds. *Proc Roy Soc B* 281, 20133287.
- 665 Boutin S, Wauters LA, McAdam AG, Humphries MM, Tosi G, Dhondt AA. 2006.  
666 Anticipatory reproduction and population growth in seed predators. *Science* 314, 1928-  
667 1930.
- 668 Breuner CW, Delehanty B, Boonstra R. 2013. Evaluating stress in natural populations of  
669 vertebrates: total CORT is not good enough. *Functional Ecology* 27, 24-36.
- 670 Brummelte S, Galea LAM. 2010. Chronic corticosterone during pregnancy and postpartum  
671 affects maternal care, cell proliferation and depressive-like behavior in the dam. *Horm*  
672 *Behav* 58:769-779.
- 673 Careau V, Buttemer WA, Buchanan KL. 2014. Developmental stress can uncouple  
674 relationships between physiology and behaviour. *Biol Lett* 10, 20140834.
- 675 Casolini P, Cigliana G, Alemá GS, Ruggieri V, Angelucci L, Catalani, A. 1997. Effect of  
676 increased maternal corticosterone during lactation on hippocampal corticosteroid  
677 receptors, stress response and learning in offspring in the early stages of life.  
678 *Neuroscience* 79:1005-1012.
- 679 Cawthon RM, Smith KR, O'Brien E, Sivatchenko A, Kerber RA. 2003. Association between  
680 telomere length in blood and mortality in people aged 60 years or older. *Lancet* 36, 393-  
681 395.

- 682 Costantini D, Verhulst S. 2009. Does high antioxidant capacity indicate low oxidative stress?  
683 *Func Ecol* 23, 506-509.
- 684 Costantini D, Marasco V, Møller AP. 2011. A meta-analysis of glucocorticoids as  
685 modulators of oxidative stress in vertebrates. *J Comp Physiol B* 181, 447-456.
- 686 Dantzer B, Fletcher QE. 2015. Telomeres shorten more slowly in slow-aging wild animals  
687 than in fast-aging ones. *Exp Gerontol* 71, 38-47.
- 688 Dantzer B, Newman AE, Boonstra R, Palme R, Boutin S, Humphries MM, McAdam AG. 2013.  
689 Density triggers maternal hormones that increase adaptive offspring growth in a wild  
690 mammal. *Science* 340:1215-1217.
- 691 Dantzer B, Dubuc C, Goncalves IB, Cram DL, Bennett NC, Ganswindt A, Heistermann M,  
692 Duncan C, Gaynor D, Clutton-Brock TH. 2019. The development of individual  
693 differences in cooperative behaviour: maternal glucocorticoid hormones later helping  
694 behaviour of offspring in wild meerkats. *Philo Trans Roy Soc B* 374, 20180117.
- 695 Descamps S, Boutin S, McAdam AG, Bearteux D, Gaillard J-M. 2009. Survival costs of  
696 reproduction vary with age in North American red squirrels. *Proc Roy Soc B* 276, 1129-  
697 1135.
- 698 Dray S, Dufour A-B. 2007. The ade4 package: implementing the duality diagram for ecologists.  
699 *J Stat Softw* 22(4). <http://doi.org/10.18637/jss.v022.i04>
- 700 Entringer S, Epel ES, Kumsta R, Lin J, Hellhammer DH, Blackburn EH, Wüst S, Wadhwa  
701 PD. 2011. Stress exposure in intrauterine life is associated with shorter telomere length in  
702 young adulthood. *PNAS* 108, E513-E518.
- 703 Fletcher QE, Selman C, Boutin S, McAdam AG, Woods SB, Seo AY, Leeuwenburgh C,

- 704 Speakman JR, Humphries MM. 2012. Oxidative damage increases with reproductive  
705 energy expenditure and is reduced by food-supplementation. *Evolution* 67:1527-1536.
- 706 Friedrich U, Griesse EU, Schwab M, Fritz P, Thon KP, Klotz U. 2000. Telomere length in  
707 different tissues of elderly patients. *Mech Ageing Dev* 119, 90-99.
- 708 Fronstin RB, Christians JK, Williams TD. 2016. Experimental reduction of haematocrit  
709 affects reproductive performance in European starlings. *Func Ecol* 30, 398-409.
- 710 Galloway LF, Etterson JR. 2007. Transgenerational plasticity is adaptive in the wild. *Science*  
711 318:1134-1136.
- 712 Garratt M, McArdle F, Stockley P, Vasilaki A, Beynon RJ, Jackson MJ, Hurst JL. 2012.  
713 Tissue-dependent changes in oxidative damage with male reproductive effort in house  
714 mice. *Func Ecol* 26, 423-433.
- 715 Halliwell B, Gutteridge J. 2015. *Free Radicals in Biology and Medicine*. Oxford University  
716 Press.
- 717 Harley CB, Futcher AB, Greider CW. 1990. Telomeres shorten during ageing of human  
718 fibroblasts. *Nature* 31, 458-460.
- 719 Harris A, Seckl J. 2011. Glucocorticoids, prenatal stress and the programming of disease. *Horm*  
720 *Behav* 59:279-289.
- 721 Haussmann MF, Heidinger BJ. 2015. Telomere dynamics may link stress exposure and  
722 ageing across generations. *Biol Lett* 11, 20150396.
- 723 Haussmann MF, Mauck RA. 2008. New strategies for telomere-based age estimation.  
724 *Molec Ecol Res* 8, 264-274.
- 725 Haussmann MF, Longenecker AS, Marchetto NM, Juliano SA, Bowden RM. 2012.

- 726 Embryonic exposure to corticosterone modifies the juvenile stress response, oxidative  
727 stress and telomere length. *Proc Roy Soc B* 279:1447-1456.
- 728 Hausmann MF, Winkler DW, O'Reilly KM, Huntington CE, Nisbet ICT, Vleck CM. 2003.  
729 Telomeres shorten more slowly in long-lived birds and mammals than in short-lived  
730 ones. *Proc Roy Soc B* 270, 1387-1392.
- 731 Hausmann MF, Winkler DW, Vleck CM. 2005. Longer telomeres associated with higher  
732 survival in birds. *Biology Letters* 1, 212-214.
- 733 Herborn KA, Heidinger BJ, Boner W, Noguera JC, Adam A, Daunt F, Monaghan P. 2014.  
734 Stress exposure in early post-natal life reduces telomere length: an experimental  
735 demonstration in a long-lived seabird. *Proc Roy Soc B* 281, 20133151.
- 736 Herrenkohl LR, Whitney JB. 1976. Effects of prepartal stress on postpartal nursing behavior,  
737 litter development and adult sexual behavior. *Physiol Behav* 17:1019-1021.
- 738 Houben JM, Moonen HJ, van Schooten FJ, Hageman GJ. 2008. Telomere length assessment:  
739 biomarker of chronic oxidative stress? *Free Radic Biol Med* 44, 235-246.
- 740 Humphries MM, Boutin S. 2000. The determinants of optimal litter size in free-ranging red  
741 squirrels. *Ecology* 81, 2867-2877.
- 742 van Kesteren F, Delehanty B, Westrick SE, Palme R, Boonstra R, Lane JE, Boutin S,  
743 McAdam AG, Dantzer B. 2018. Experimental increases in glucocorticoids alter function  
744 of the HPA axis in wild red squirrels without negatively impacting survival and  
745 reproduction. *Physiol Biochem Zool* *in press*.
- 746 Kotrschal A, Illmonen P, Penn DJ. 2007. Stress impacts telomere dynamics. *Biol Lett*  
747 3, 128-130.
- 748 Kuznetsova, A., Brockhoff, P., & Christensen, R. (2017). *lmerTest: Tests in linear mixed*

- 749 effects models. *J Stat Softw*, 82, 1–26. doi: 10.18637/jss.v082.i13
- 750 Larsen KW, Boutin S. 1994. Movements, survival, and settlement of red squirrel  
751 (*Tamiasciurus hudsonicus*) offspring. *Ecology* 75, 214-223.
- 752 Lee W-S, Monaghan P, Metcalfe NB. 2013. Experimental demonstration of the growth rate-  
753 lifespan trade-off. *Proc Roy Soc B* 280, 20122370.
- 754 Lemaître J-F, Berger V, Bonenfant C, Douhard M, Gamelon M, Plard F, Gaillard J-M. 2015.  
755 Early-late life trade-offs and the evolution of ageing in the wild. *Proc R Soc B* 282,  
756 20150209.
- 757 Love OP, Williams TD. 2008. The adaptive value of stress-induced phenotypes: effects of  
758 maternally derived corticosterone on sex-biased investment, cost of reproduction, and  
759 maternal fitness. *Am Nat* 172:E135-E149.
- 760 Lupien SJ, McEwen BS, Gunnar MR, Heim C. 2009. Effects of stress throughout the lifespan on  
761 the brain, behavior and cognition. *Nat Rev Neurosci* 10:434-445.
- 762 McAdam AG, Boutin S, Réale D, Berteaux D. 2002. Maternal effects and the potential for  
763 evolution in a natural population of animals *Evolution* 56, 846-851.
- 764 McAdam AG, Boutin S, Sykes AK, Humphries MM. 2007. Life histories of female red  
765 squirrels and their contributions to population growth and lifetime fitness *Ecoscience* 14,  
766 362-369.
- 767 Marchetto NM, Glynn RA, Ferry ML, Ostojic M, Wolff SM, Yao R, Haussmann MF. 2016.  
768 Prenatal stress and newborn telomere length. *Am J Obstet Gynecol* 215, 94.e1-8.
- 769 Merrill L, Grindstaff JL. 2018. Early life stress strengthens trait covariance: a plastic response  
770 that results in reduced flexibility. *Am Nat* 192, 593-604.
- 771 Metcalfe NB, Monaghan P. 2001. Compensation for a bad start: grow now, pay later? *Trends*

- 772 Ecol Evol 16:254-260.
- 773 Monaghan P, Haussmann MF. 2006. Do telomere dynamics link lifestyle and lifespan?  
774 Trends Ecol Evol 21, 47-53.
- 775 Monaghan P, Haussmann MF. 2015. The positive and negative consequences of stressors  
776 during early life. Early Hum Dev 91, 643-647.
- 777 Monaghan P, Ozanne SE. 2018. Somatic growth and telomere dynamics in vertebrates:  
778 relationships, mechanisms and consequences. Philos Trans Royal Soc London B 373,  
779 20160446.
- 780 Monaghan P, Metcalfe NB, Torres, R. 2009. Oxidative stress as a mediator of life history  
781 trade-offs: mechanisms, measurements and interpretation. Ecol Lett 12:75-92.
- 782 Mousseau TA, Fox CW. 1998. Maternal Effects as Adaptations. Oxford Univ. Press, Oxford,  
783 UK.
- 784 Nephew BC, Bridges RS. 2011. Effects of chronic social stress during lactation on maternal  
785 behavior and growth in rats. Stress 14, 677-684.
- 786 Nettle D, Frankenhuys WE, Rickard IJ. 2013. The evolution of predictive adaptive responses  
787 in human life history. Proceedings of the Royal Society B 280, 20131343.
- 788 R Development Core Team. 2013. R: a language and environment for statistical computing.  
789 Vienna, Austria: R Foundation for Statistical Computing.
- 790 Reichert S, Stier A. 2017. Does oxidative stress shorten telomeres *in vivo*? A review.  
791 Biol Lett 13, 20170463.
- 792 Reznick DA, Bryga H, Endler JA. 1990. Experimentally induced life-history evolution in a  
793 natural population. Nature 346, 357-359.
- 794 Rudolph KL, Chang S, Lee HW, Blasco M, Gottlieb GJ, Greider C, DePinho RA. 1999.

795 Longevity, stress response, and cancer in aging telomerase-deficient mice. *Cell* 96, 701-  
796 712.

797 Salomons HM, Mulder GA, van de Zande L, Haussmann MF, Linskens MHK, Verhulst S.  
798 2009. Telomere shortening and survival in free-living corvids. *Proc Roy Soc B* 276,  
799 3157-3165.

800 Sapolsky RM, Romero LM, Munck AU. 2000. How do glucocorticoids influence stress  
801 responses? Integrating permissive, suppressive, stimulatory, and preparative actions.  
802 *Endocrine Reviews* 21:55-89.

803 Selman C, Blount JD, Nussey DH, Speakman JR. 2012. Oxidative damage, ageing, and life-  
804 history evolution: where now? *Trends Ecol Evol* 27:570-577.

805 Shalev I. 2012. Early life stress and telomere length: investigating the connection and  
806 possible mechanisms: a critical survey of the evidence base, research methodology and  
807 basic biology. *BioEssays* 34, 943-952.

808 Shalev I, Belsky J. 2016. Early-life stress and reproductive cost: a two-hit developmental  
809 model of accelerated aging? *Med Hypotheses* 90, 41-47.

810 Sheriff MJ, Bell A, Boonstra R, Dantzer B, Lavergne SG, McGhee KE, MacLeod KJ, Winandy  
811 L, Zimmer C, Love OP. 2017. Integrating ecological and evolutionary context in the  
812 study of maternal stress. *Integrative and Comparative Biology* 57, 437-449.

813 Simons MJP. 2015. Questioning causal involvement of telomeres in aging. *Ageing Res Rev*  
814 24, 191-196.

815 Smith SM, Nager RG, Costantini D. 2016. Meta-analysis indicates that oxidative stress is  
816 both a constraint on and a cost of growth. *Ecol Evol* 6, 2833-2842.

817 Stearns SC. 1992. *The Evolution of Life Histories*. Oxford University Press, London.



- 818 Stearns SC, Ackermann M, Doebeli M, Kaiser M. 2000. Experimental evolution of aging,  
819 growth, and reproduction in fruitflies. *PNAS* 97, 3309-3313.
- 820 Studd EK, Boutin S, McAdam AG, Krebs CJ, Humphries MM. 2015. Predators, energetics  
821 and fitness drive neonatal reproductive failure in red squirrels. *J Anim Ecol* 84, 249-259.
- 822 Sudyka J, Arct A, Drobniak S, Gustafsson L, Cichon M. 2016. Longitudinal studies confirm  
823 faster telomere erosion in short-lived bird species. *J Ornithol* 157, 373-375.
- 824 Tricola GM, Simons MJP, Atema E, Boughton RK, Brown JL, Dearborn DC, Eimes JA,  
825 Huntington CE, Kitaysky AS, Juola FA, Lank DB, Litwa HP, Mulder EGA, Nisbet ICT,  
826 Okanoya K, Safran R, Schoech SJ, Schreiber EZ, Thompson PM, Verhulst S,  
827 Wheelwright NT, Winkler DW, Young R, Vleck CM, Haussmann MF. 2018. The rate of  
828 telomere loss is related to maximum lifespan in birds. *Philo Trans Roy Soc B* 373,  
829 20160445.
- 830 Weaver ICG, Cervoni N, Champagne FA, D'Alessio AC, Sharma S, Seckl JR, Dymov S,  
831 Szyf M, Meaney MJ. 2004. Epigenetic programming by maternal behavior. *Nat Neurosci*  
832 7:847-854.
- 833 Weinstock M. 2005. The potential influence of maternal stress hormones on development and  
834 mental health of the offspring. *Brain Behav Immun* 19:296-308.
- 835 Westrick SE, Taylor RW, Boutin S, Lane JE, McAdam AG, Dantzer B. Attentive red squirrel  
836 mothers have faster-growing pups and higher lifetime reproductive success. *BioRxiv*  
837 [Preprint - October 29 2019]. Doi: <https://doi.org/10.1101/594093>
- 838 Wingfield JC, Maney DL, Breuner CL, Jacobs JD, Lynn S, Ramenofsky M, Richardson RD.  
839 1998. Ecological bases of hormone-behavior interactions: the “emergency life history  
840 stage”. *Am Zool* 38, 191-206.

841 You JM, Yun SJ, Nam KN, Kang C, Won R, Lee EH. 2009. Mechanism of glucocorticoid-  
842 induced oxidative stress in rat hippocampal slice cultures. *Can J Physiol Pharmacol* 87,  
843 440-447.

844 Zarrow MX, Philpott JE, Denenberg VH. 1970. Passage of <sup>14</sup>C-4 corticosterone from the rat  
845 mother to the foetus and neonate. *Nature* 226:1058-1059

846 von Zglinicki T. 2002. Oxidative stress shortens telomeres. *Trends Biochem Sci* 27, 339-344.

847 Zuur AF, Ieno EN, Elphick CS. 2010. A protocol for data exploration to avoid common  
848 statistical problems. *Methods Ecol Evol* 1, 3-14.

849

850

851

852

853

854

855 **Table 1. Results from principal component analyses to derive axes of variation of oxidative**  
856 **stress state in weaned pups.** For each principal component shown, high values correspond to  
857 lower oxidative stress levels as they reflect samples with low levels of two (Blood PC2, Liver  
858 PC1) or one (Heart PC2) antioxidants (total antioxidant capacity, superoxide dismutase) and for  
859 heart tissue, higher levels of oxidative protein damage (protein carbonyls).  
860

| <b>Measurement</b>              | <b>Tissue</b>    |                  |                  |
|---------------------------------|------------------|------------------|------------------|
|                                 | <b>Blood PC2</b> | <b>Heart PC2</b> | <b>Liver PC1</b> |
| Total Antioxidant Capacity      | -0.57            | -0.0007          | -0.70            |
| Superoxide Dismutase            | -0.82            | -0.71            | -0.70            |
| Protein Carbonyls               | 0.03             | 0.71             | 0.09             |
| <b>Prop. Variance Explained</b> | 34.3%            | 34.3%            | 38.5%            |

861  
862  
863

864 **Table 2. Effects of treating female red squirrels with glucocorticoids (GCs) during**  
 865 **pregnancy on offspring postnatal growth (A) and structural size (B).** Offspring growth is the  
 866 linear change in body mass from ~1 d to ~25 d of age. Offspring size is a composite variable  
 867 where high scores of PC1 correspond to offspring (one estimate of size obtained at ~25 d of age)  
 868 with larger zygomatic arch widths and longer hind foot lengths. Models contained random  
 869 intercept term for litter identity (growth model:  $\sigma^2 = 0.07$ ; size model:  $\sigma^2 = 0.29$ ).  
 870

(A)

| Offspring trait               | Variable                                 | b            | SE          | t           | df          | P-value           |
|-------------------------------|------------------------------------------|--------------|-------------|-------------|-------------|-------------------|
| <b>Growth</b>                 | <b>Intercept (2012, Control, Female)</b> | <b>1.81</b>  | <b>0.13</b> | <b>14.2</b> | <b>35.6</b> | <b>&lt;0.0001</b> |
|                               | Year (2015)                              | -0.09        | 0.22        | -0.42       | 34.5        | 0.67              |
|                               | <b>Year (2016)</b>                       | <b>-0.58</b> | <b>0.13</b> | <b>-4.3</b> | <b>34.2</b> | <b>&lt;0.0001</b> |
|                               | <b>Year (2017)</b>                       | <b>-0.74</b> | <b>0.13</b> | <b>-5.8</b> | <b>34.2</b> | <b>&lt;0.0001</b> |
|                               | <b>Sex (Male)</b>                        | <b>0.074</b> | <b>0.03</b> | <b>2.10</b> | <b>72.6</b> | <b>0.04</b>       |
|                               | Birth date                               | -0.001       | 0.05        | -0.03       | 34.6        | 0.98              |
|                               | Litter size                              | 0.06         | 0.09        | 0.67        | 37.0        | 0.50              |
|                               | <b>Treatment (GCs)</b>                   | <b>0.28</b>  | <b>0.09</b> | <b>3.07</b> | <b>41.4</b> | <b>0.004</b>      |
|                               | Treatment (GCs) x Sex (Male)             | -0.08        | 0.05        | -1.64       | 73.8        | 0.11              |
| Treatment (GCs) x Litter size | -0.08                                    | 0.11         | -0.68       | 36.7        | 0.50        |                   |

Results based upon 114 offspring from 43 litters across 4 years

(B)

| Offspring trait   | Variable                          | b            | SE          | t            | df          | P-value      |
|-------------------|-----------------------------------|--------------|-------------|--------------|-------------|--------------|
| <b>Size (PC1)</b> | Intercept (2015, Control, Female) | 0.14         | 0.41        | 0.35         | 31.9        | 0.72         |
|                   | <b>Year (2016)</b>                | <b>-1.14</b> | <b>0.43</b> | <b>-2.65</b> | <b>28.9</b> | <b>0.013</b> |
|                   | Year (2017)                       | -0.17        | 0.43        | -0.39        | 29.4        | 0.70         |
|                   | Sex (Male)                        | 0.27         | 0.16        | 1.69         | 59.6        | 0.09         |
|                   | Birth date                        | 0.14         | 0.11        | 1.25         | 25.9        | 0.22         |
|                   | Litter size                       | 0.02         | 0.21        | 0.11         | 33.2        | 0.92         |
|                   | Treatment (GCs)                   | 0.10         | 0.25        | 0.39         | 44.8        | 0.70         |
|                   | Treatment (GCs) x Sex (Male)      | -0.10        | 0.22        | -0.42        | 60.8        | 0.67         |
|                   | Treatment (GCs) x Litter size     | -0.21        | 0.27        | -0.77        | 32.2        | 0.44         |

Results based upon 88 offspring from 34 litters across 3 years

871  
872

873 **Table 3 Effects of treating female red squirrels with different dosages of glucocorticoids**  
 874 **(GCs) during (A) pregnancy or (B) lactation on the first body mass measure of offspring**  
 875 **(“birth mass”).** Offspring body mass was recorded soon after birth. Models contained random  
 876 intercept term for litter identity (pregnancy model:  $\sigma^2 = 2.3$ ; lactation model:  $\sigma^2 = 0.83$ ).  
 877

(A)

| Treatment Period              | Variable                                 | b            | SE          | t            | df          | P-value           |
|-------------------------------|------------------------------------------|--------------|-------------|--------------|-------------|-------------------|
| Pregnancy                     | <b>Intercept (2012, Control, Female)</b> | <b>14.64</b> | <b>0.50</b> | <b>29.4</b>  | <b>53.1</b> | <b>&lt;0.0001</b> |
|                               | <b>Age of pup</b>                        | <b>4.81</b>  | <b>0.22</b> | <b>21.8</b>  | <b>49.0</b> | <b>&lt;0.0001</b> |
|                               | Year (2015)                              | 0.04         | 1.1         | 0.04         | 48.7        | 0.97              |
|                               | Year (2016)                              | -0.13        | 0.60        | -0.22        | 47.9        | 0.83              |
|                               | Year (2017)                              | 0.59         | 0.52        | 1.14         | 48.8        | 0.26              |
|                               | Sex (Male)                               | 0.32         | 0.23        | 1.35         | 117.8       | 0.18              |
|                               | Birth date                               | -0.20        | 0.24        | -0.83        | 47.9        | 0.41              |
|                               | Litter size                              | -0.35        | 0.50        | -0.70        | 53.4        | 0.49              |
|                               | <b>Treatment (GCs)</b>                   | <b>-1.22</b> | <b>0.49</b> | <b>-2.51</b> | <b>59.8</b> | <b>0.015</b>      |
|                               | Treatment (GCs) x Sex (Male)             | 0.42         | 0.31        | 1.33         | 119.4       | 0.18              |
| Treatment (GCs) x Litter size | 0.59                                     | 0.57         | 1.03        | 52.6         | 0.31        |                   |

Results based upon 168 offspring from 57 litters across 4 years

(B)

| Treatment Period              | Variable                                 | b           | SE          | t           | df          | P-value           |
|-------------------------------|------------------------------------------|-------------|-------------|-------------|-------------|-------------------|
| Lactation                     | <b>Intercept (2015, Control, Female)</b> | <b>13.9</b> | <b>0.47</b> | <b>29.5</b> | <b>37.9</b> | <b>&lt;0.0001</b> |
|                               | <b>Age of pup</b>                        | <b>5.02</b> | <b>0.23</b> | <b>23.2</b> | <b>22.2</b> | <b>&lt;0.0001</b> |
|                               | Year (2016)                              | 0.43        | 0.81        | 0.53        | 19.9        | 0.59              |
|                               | Year (2017)                              | 0.76        | 0.43        | 1.75        | 21.6        | 0.09              |
|                               | Sex (Male)                               | 0.13        | 0.36        | 0.36        | 49.3        | 0.72              |
|                               | Birth date                               | 0.13        | 0.24        | 0.54        | 22.1        | 0.59              |
|                               | Litter size                              | 0.29        | 0.39        | 0.75        | 22.5        | 0.46              |
|                               | Treatment (GCs)                          | 0.20        | 0.51        | 0.39        | 42.8        | 0.70              |
|                               | Treatment (GCs) x Sex (Male)             | 0.26        | 0.47        | 0.55        | 49.5        | 0.58              |
| Treatment (GCs) x Litter size | -0.22                                    | 0.47        | -0.48       | 24.0        | 0.64        |                   |

Results based upon 73 offspring from 30 litters across 3 years

878  
879

880 **Table 4. Effects of treating female red squirrels with GCs during lactation on offspring**  
 881 **postnatal growth (A) and structural (skeletal) size (B).** Offspring growth is the linear change  
 882 in body mass from ~1 d to ~25 d of age. Offspring size is a composite variable where high scores  
 883 of PC1 correspond to offspring (~25 d of age) with larger zygomatic arch widths and longer hind  
 884 foot lengths. Models contained random intercept term for litter identity (growth model:  $\sigma^2 =$   
 885 0.19; size model:  $\sigma^2 = 0.69$ ).  
 886

| (A) | Offspring trait | Variable                                 | b            | SE          | t            | df          | P-value           |
|-----|-----------------|------------------------------------------|--------------|-------------|--------------|-------------|-------------------|
|     | <b>Growth</b>   | <b>Intercept (2015, Control, Female)</b> | <b>1.88</b>  | <b>0.17</b> | <b>10.9</b>  | <b>25.8</b> | <b>&lt;0.0001</b> |
|     |                 | Year (2016)                              | -0.12        | 0.35        | -0.34        | 22.2        | 0.74              |
|     |                 | Year (2017)                              | -0.29        | 0.18        | -1.57        | 22.6        | 0.13              |
|     |                 | Sex (Male)                               | -0.007       | 0.06        | -0.11        | 41.04       | 0.91              |
|     |                 | <b>Birth date</b>                        | <b>0.29</b>  | <b>0.10</b> | <b>2.97</b>  | <b>22.6</b> | <b>0.007</b>      |
|     |                 | Litter size                              | 0.09         | 0.16        | 0.55         | 22.8        | 0.59              |
|     |                 | <b>Treatment (GCs)</b>                   | <b>-0.37</b> | <b>0.18</b> | <b>-2.08</b> | <b>27.0</b> | <b>0.047</b>      |
|     |                 | Treatment (GCs) x Sex (Male)             | 0.09         | 0.08        | 1.06         | 41.2        | 0.30              |
|     |                 | Treatment (GCs) x Litter size            | 0.07         | 0.19        | 0.38         | 23.0        | 0.71              |

Results based upon 72 offspring from 30 litters across 3 years

| (B) | Offspring trait   | Variable                                 | b           | SE          | t           | df          | P-value      |
|-----|-------------------|------------------------------------------|-------------|-------------|-------------|-------------|--------------|
|     | <b>Size (PC1)</b> | <b>Intercept (2015, Control, Female)</b> | <b>0.14</b> | <b>0.36</b> | <b>0.40</b> | <b>43.8</b> | <b>0.69</b>  |
|     |                   | Year (2016)                              | 0.04        | 0.56        | 0.07        | 18.8        | 0.94         |
|     |                   | <b>Year (2017)</b>                       | <b>0.70</b> | <b>0.31</b> | <b>2.29</b> | <b>23.2</b> | <b>0.03</b>  |
|     |                   | Sex (Male)                               | 0.22        | 0.29        | 0.76        | 46.1        | 0.45         |
|     |                   | <b>Birth date</b>                        | <b>0.56</b> | <b>0.16</b> | <b>3.37</b> | <b>22.6</b> | <b>0.003</b> |
|     |                   | Litter size                              | -0.10       | 0.28        | -0.37       | 25.3        | 0.71         |
|     |                   | Treatment (GCs)                          | -0.56       | 0.37        | -1.51       | 44.1        | 0.14         |
|     |                   | Treatment (GCs) x Sex (Male)             | -0.02       | 0.37        | -0.06       | 45.0        | 0.95         |
|     |                   | Treatment (GCs) x Litter size            | 0.64        | 0.33        | 1.90        | 25.6        | 0.068        |

Results based upon 67 offspring from 30 litters across 3 years

887  
888

889 **Figure 1. Effects of treating pregnant or lactating female red squirrels with glucocorticoids**  
890 **(GCs) on offspring postnatal growth and structural size. A)** Offspring from females treated  
891 with GCs (n = 62 pups) during pregnancy grew significantly faster than those from controls (n =  
892 52,  $t_{41.4} = 3.07$ ,  $P = 0.004$ ). **B)** Offspring from females treated with GCs during lactation (n = 36)  
893 grew significantly slower than those from controls (n = 36,  $t_{27} = -2.08$ ,  $P = 0.047$ ). **C & D)**  
894 Offspring from mothers treated with GCs either during pregnancy (n = 46) or lactation (n = 35)  
895 did not differ in structural size compared to those from controls (pregnancy: n = 42; lactation: n  
896 = 32, Tables 2 & 4). Offspring growth was measured as the change in body mass from ~1 to ~25  
897 d of age. Offspring size is a composite variable where high scores of PC1 correspond to  
898 offspring with larger zygomatic arch widths and longer hind foot lengths when pups were ~25 d  
899 of age. Results in Tables 2 & 4. Upper and lower hinges correspond to the first and third  
900 quartiles while white diamonds indicate means and horizontal line indicate medians.

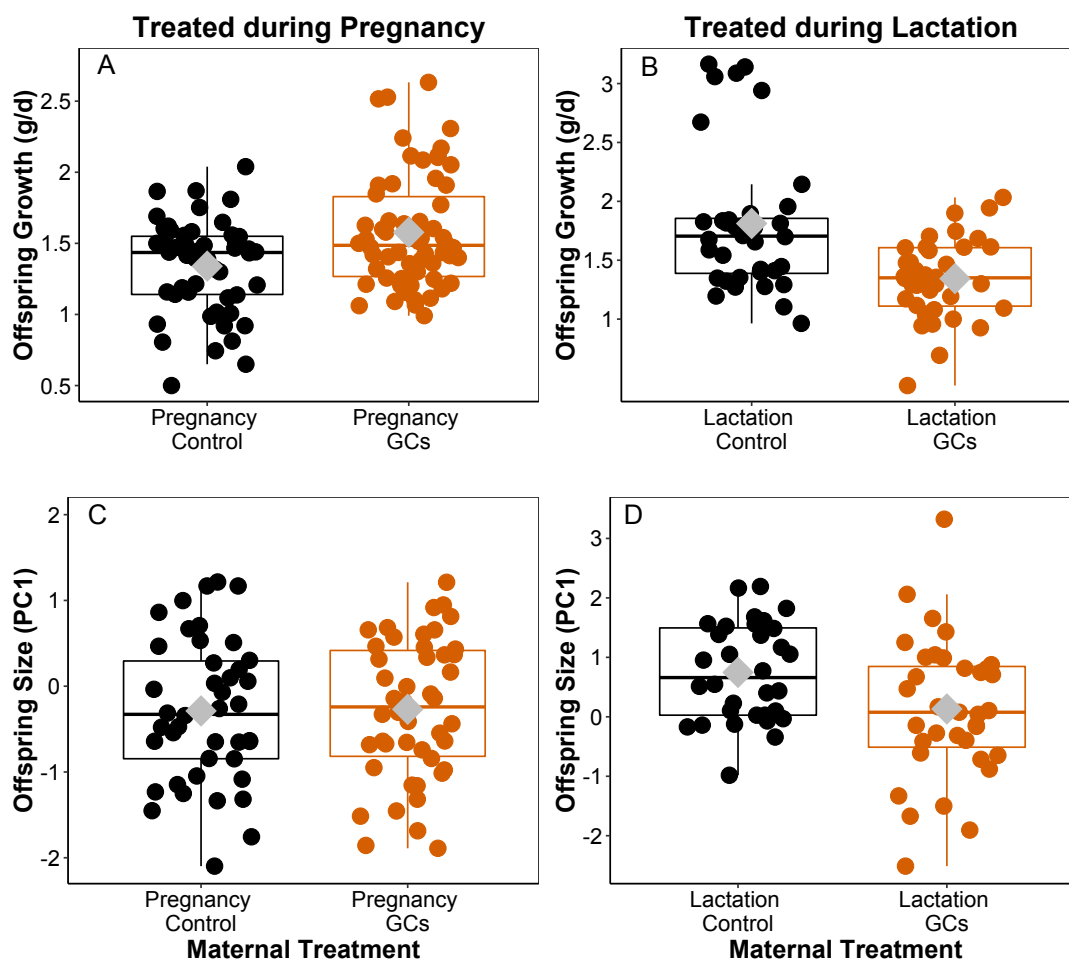

901

902



903 **Figure 2. Effects of treating pregnant or lactating female red squirrels with glucocorticoids**  
904 **(GCs) on oxidative stress levels in blood, liver, and heart tissue from weaned juvenile red**  
905 **squirrels.** There were no significant treatment effects on oxidative stress levels in the blood (A,  
906 B), heart (C, D), or liver (E, F) for offspring produced by mothers treated with GCs during  
907 pregnancy (n = 20 pups) or lactation (n = 13) compared with the controls (pregnancy: n = 21;  
908 lactation: n = 14, statistical results in Tables S3 & S5). Values on y-axes reflect a composite  
909 variable generated by separate principal component analyses for blood, heart, and liver tissue  
910 where high scores correspond to low levels of one or two of the antioxidants (TAC, SOD) and,  
911 for heart, higher levels of protein damage (PCC; see Table 1). Note differences between y-axes  
912 among the panels.

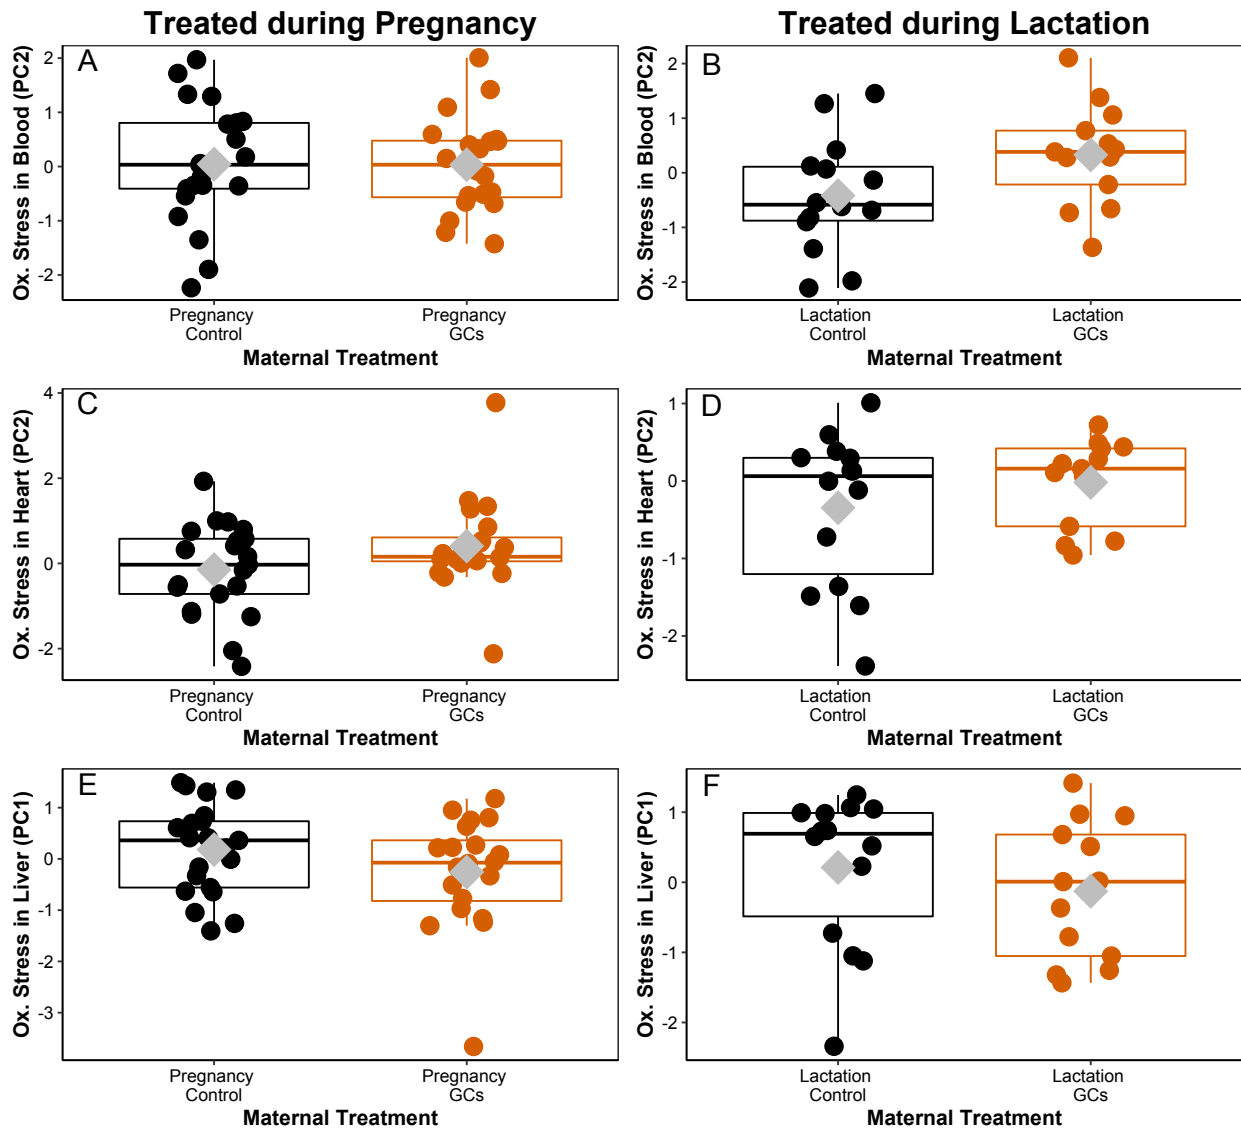

913

914 **Figure 3. Effects of treating pregnant or lactating female red squirrels with glucocorticoids**  
915 **(GCs) on mean liver telomere lengths in weaned offspring. A & B) There were no significant**  
916 **treatment effects on liver telomere lengths for offspring produced by mothers treated with GCs**  
917 **during pregnancy (n = 20 pups) or lactation (n = 13) compared with the controls (pregnancy: n =**  
918 **21; lactation: n = 14, statistical results in Table S4).**

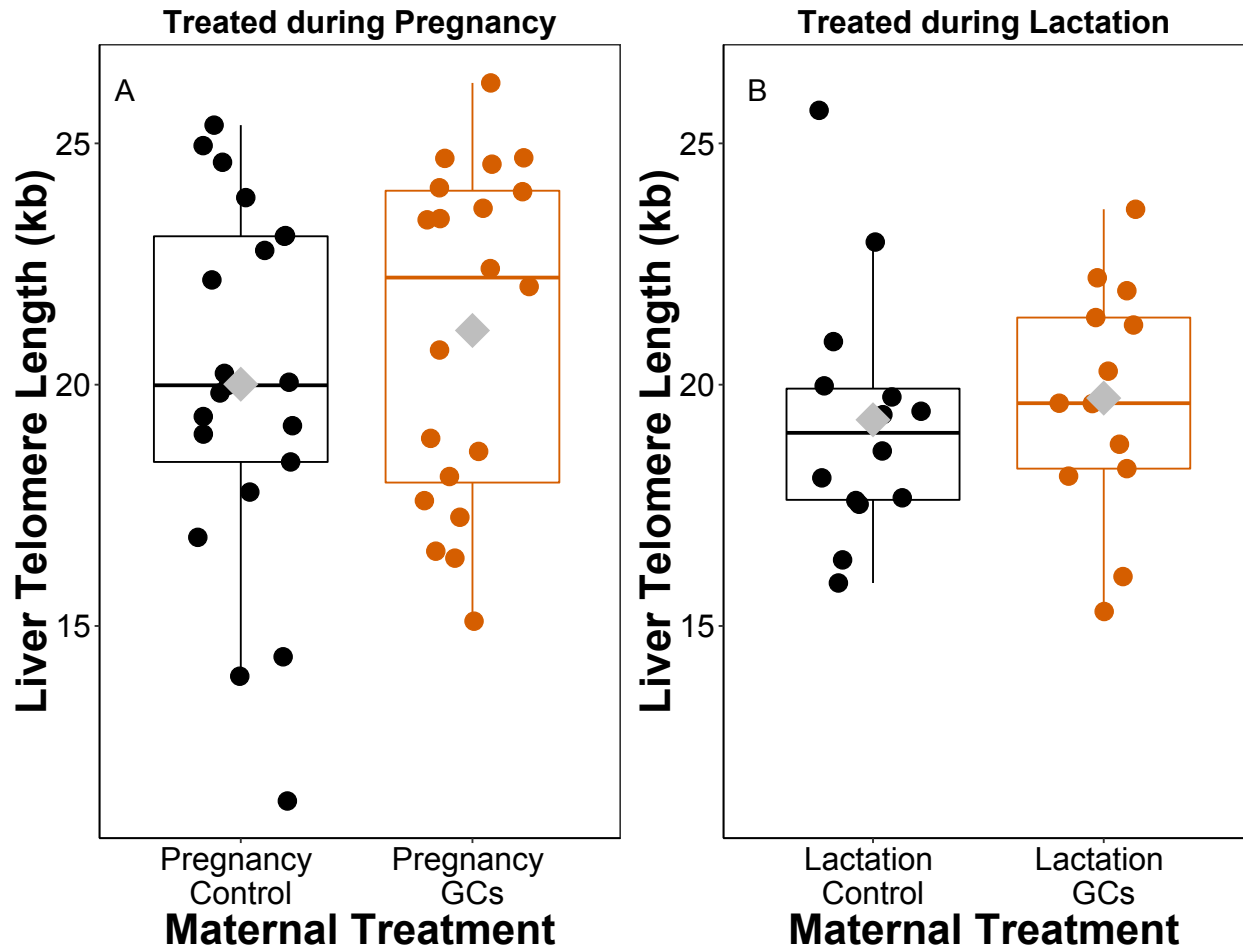

919

1

*Electronic Supplementary Material*

2

3 **Maternal glucocorticoids promote offspring growth without inducing oxidative stress or**

4 **shortening telomeres in wild red squirrels**

5

6 Ben Dantzer<sup>1,2</sup>, Freya van Kesteren<sup>1</sup>, Sarah E. Westrick<sup>1</sup>, Stan Boutin<sup>3</sup>, Andrew G. McAdam<sup>4</sup>,

7 Jeffrey E. Lane<sup>5</sup>, Robert Gillespie<sup>6</sup>, Ariana Majer<sup>7</sup>, Mark Haussmann<sup>7</sup>, Pat Monaghan<sup>6</sup>

8

## 9 **Supplementary Results**

10

11 **Table S1. Preliminary analyses for effects of treating female red squirrels with different**  
 12 **dosages of glucocorticoids (GCs) during (A) pregnancy or (B) lactation on offspring**  
 13 **postnatal growth.** Offspring growth is the linear change in body mass from ~1 d to ~25 d of  
 14 age. The dosages of GCs are listed below with 0 mg (pregnancy control treatment, n = 52 pups;  
 15 lactation control treatment, n = 36 pups) as the reference value. Models contained random  
 16 intercept term for litter identity (pregnancy model:  $\sigma^2 = 0.059$ ; lactation model:  $\sigma^2 = 0.23$ ). Note  
 17 that these results were used to justify our decision of lumping the different pregnancy GCs  
 18 treatment groups (with different dosages of GCs) together.

(A)

| Treatment Period             | Variable                              | b            | SE          | t            | df           | P-value           |
|------------------------------|---------------------------------------|--------------|-------------|--------------|--------------|-------------------|
| Pregnancy                    | <b>Intercept (2012, Female, 0 mg)</b> | <b>1.56</b>  | <b>0.17</b> | <b>9.3</b>   | <b>32.0</b>  | <b>&lt;0.0001</b> |
|                              | Year (2015)                           | 0.06         | 0.21        | 0.31         | 32.2         | 0.76              |
|                              | Year (2016)                           | -0.26        | 0.18        | -1.41        | 31.7         | 0.17              |
|                              | <b>Year (2017)</b>                    | <b>-0.41</b> | <b>0.18</b> | <b>-2.28</b> | <b>31.6</b>  | <b>0.03</b>       |
|                              | Sex (Male)                            | 0.037        | 0.02        | 1.45         | 74.5         | 0.15              |
|                              | Birth date                            | -0.001       | 0.05        | -0.01        | 32.8         | 0.99              |
|                              | Litter size                           | 0.035        | 0.05        | 0.72         | 34.2         | 0.48              |
|                              | Treatment (GC dosage)                 |              |             |              |              |                   |
|                              | 3 mg GCs (n = 9 pups)                 | 0.37         | 0.24        | 1.52         | 30.9         | 0.14              |
|                              | <b>6 mg GCs (n = 7 pups)</b>          | <b>0.68</b>  | <b>0.20</b> | <b>3.45</b>  | <b>32.4</b>  | <b>0.001</b>      |
| 8 mg GCs (n = 45 pups)       | 0.12                                  | 0.09         | 1.40        | 33.1         | 0.17         |                   |
| <b>12 mg GCs (n = 1 pup)</b> | <b>0.91</b>                           | <b>0.31</b>  | <b>2.95</b> | <b>36.9</b>  | <b>0.005</b> |                   |

Results based upon 114 offspring from 43 litters across 4 years

(B)

| Treatment Period        | Variable                              | b           | SE          | t           | df          | P-value           |
|-------------------------|---------------------------------------|-------------|-------------|-------------|-------------|-------------------|
| Lactation               | <b>Intercept (2015, 0 mg, Female)</b> | <b>1.96</b> | <b>0.19</b> | <b>9.9</b>  | <b>23.7</b> | <b>&lt;0.0001</b> |
|                         | Year (2016)                           | -0.12       | 0.34        | -0.35       | 22.1        | 0.73              |
|                         | Year (2017)                           | -0.49       | 0.25        | -1.94       | 22.5        | 0.065             |
|                         | Sex (Male)                            | 0.04        | 0.04        | 1.10        | 42.5        | 0.27              |
|                         | <b>Birth date</b>                     | <b>0.25</b> | <b>0.10</b> | <b>2.46</b> | <b>22.8</b> | <b>0.021</b>      |
|                         | Litter size                           | 0.15        | 0.09        | 1.53        | 23.1        | 0.14              |
|                         | Treatment (GCs)                       |             |             |             |             |                   |
| 8 mg GCs (n = 24 pups)  | -0.16                                 | 0.22        | -0.74       | 22.1        | 0.47        |                   |
| 12 mg GCs (n = 13 pups) | -0.55                                 | 0.27        | -1.99       | 23.1        | 0.058       |                   |

Results based upon 72 offspring from 30 litters across 3 years

20 **Table S2. Effects of treating female red squirrels with GCs during (A) pregnancy or (B)**  
 21 **lactation on offspring haematocrit levels (packed red blood cell volume) collected from**  
 22 **weaned offspring.** Results for the pregnancy model contained random intercept term for litter  
 23 identity (pregnancy:  $\sigma^2 = 18.8$ ) whereas results for the lactation model are from a general linear  
 24 model.  
 25

(A)

| Treatment Period | Variable                                 | b           | SE         | t           | df          | P-value           |
|------------------|------------------------------------------|-------------|------------|-------------|-------------|-------------------|
| Pregnancy        | <b>Intercept (2015, Control, Female)</b> | <b>46.6</b> | <b>3.3</b> | <b>14.2</b> | <b>18.5</b> | <b>&lt;0.0001</b> |
|                  | Year (2016)                              | -4.93       | 3.5        | -1.42       | 17.0        | 0.17              |
|                  | Year (2017)                              | -4.78       | 3.3        | -1.45       | 16.5        | 0.17              |
|                  | Sex (Male)                               | 1.88        | 1.1        | 1.75        | 16.2        | 0.10              |
|                  | Birth date                               | -0.39       | 1.2        | -0.31       | 18.4        | 0.76              |
|                  | Growth                                   | -1.14       | 1.3        | -0.88       | 29.9        | 0.38              |
|                  | Litter size                              | -0.75       | 1.2        | -0.62       | 17.4        | 0.54              |
|                  | Treatment (GCs)                          | -0.45       | 2.1        | -0.21       | 18.8        | 0.84              |
|                  | Treatment (GCs) x Growth                 | 1.85        | 2.2        | 0.85        | 29.7        | 0.40              |

Results based upon 39 offspring from 25 litters across 3 years

(B)

| Treatment Period | Variable                                 | b            | SE         | t            | df        | P-value           |
|------------------|------------------------------------------|--------------|------------|--------------|-----------|-------------------|
| Lactation        | <b>Intercept (2015, Control, Female)</b> | <b>44.5</b>  | <b>2.3</b> | <b>19.4</b>  | <b>15</b> | <b>&lt;0.0001</b> |
|                  | <b>Year (2016)</b>                       | <b>-6.35</b> | <b>2.9</b> | <b>-2.17</b> | <b>15</b> | <b>0.046</b>      |
|                  | Year (2017)                              | -4.16        | 2.3        | -1.77        | 15        | 0.096             |
|                  | <b>Sex (Male)</b>                        | <b>5.27</b>  | <b>2.0</b> | <b>2.57</b>  | <b>15</b> | <b>0.021</b>      |
|                  | <b>Birth date</b>                        | <b>3.99</b>  | <b>1.8</b> | <b>2.20</b>  | <b>15</b> | <b>0.04</b>       |
|                  | Growth                                   | -2.13        | 1.7        | -1.23        | 15        | 0.24              |
|                  | Litter size                              | 2.76         | 1.9        | 1.46         | 15        | 0.16              |
|                  | Treatment (GCs)                          | 2.27         | 2.3        | 0.98         | 15        | 0.34              |
|                  | Treatment (GCs) x Growth                 | 2.56         | 2.3        | 1.09         | 15        | 0.29              |

Results based upon 24 offspring from 16 litters across 3 years

26  
 27  
 28

29 **Table S3. Effects of treating pregnant red squirrels with GCs on oxidative stress levels in**  
 30 **(A) blood, (B) heart, and (C) liver tissue from weaned offspring.** High PC scores correspond  
 31 to low levels of antioxidants and, for heart, higher levels of protein damage (see Table 1).  
 32 Models for blood and liver tissues contained random intercept term for litter ID (blood:  $\sigma^2 =$   
 33 0.32; liver:  $\sigma^2 = 0.04$ ).  
 34

(A)

| Offspring trait | Variable                          | b            | SE          | t            | df          | P-value      |
|-----------------|-----------------------------------|--------------|-------------|--------------|-------------|--------------|
| Blood PC2       | Intercept (2015, Control, Female) | -0.61        | 0.53        | -1.14        | 14.0        | 0.27         |
|                 | Year (2016)                       | 0.44         | 0.57        | 0.76         | 13.8        | 0.46         |
|                 | Year (2017)                       | 0.32         | 0.54        | 0.59         | 13.6        | 0.56         |
|                 | <b>Sex (Male)</b>                 | <b>0.58</b>  | <b>0.28</b> | <b>2.06</b>  | <b>23.8</b> | <b>0.050</b> |
|                 | <b>Birth date</b>                 | <b>-0.50</b> | <b>0.22</b> | <b>-2.29</b> | <b>18.9</b> | <b>0.034</b> |
|                 | Growth                            | -0.15        | 0.25        | -0.62        | 23.5        | 0.54         |
|                 | Litter size                       | -0.37        | 0.21        | -1.79        | 17.4        | 0.09         |
|                 | Treatment (GCs)                   | 0.21         | 0.37        | 0.57         | 16.6        | 0.57         |
|                 | Treatment (GCs) x Growth          | -0.57        | 0.42        | -1.33        | 21.0        | 0.20         |

(B)

| Offspring trait | Variable                          | b      | SE   | t     | df | P-value |
|-----------------|-----------------------------------|--------|------|-------|----|---------|
| Heart PC2       | Intercept (2015, Control, Female) | -0.69  | 0.51 | -1.34 | 32 | 0.19    |
|                 | Year (2016)                       | 0.99   | 0.55 | 1.78  | 32 | 0.084   |
|                 | Year (2017)                       | 0.62   | 0.52 | 1.19  | 32 | 0.24    |
|                 | Sex (Male)                        | -0.09  | 0.34 | -0.26 | 32 | 0.79    |
|                 | Birth date                        | 0.34   | 0.22 | 1.52  | 32 | 0.14    |
|                 | Growth                            | -0.003 | 0.25 | -0.01 | 32 | 0.99    |
|                 | Litter size                       | 0.41   | 0.21 | 1.94  | 32 | 0.06    |
|                 | Treatment (GCs)                   | 0.27   | 0.37 | 0.73  | 32 | 0.47    |
|                 | Treatment (GCs) x Growth          | 0.39   | 0.43 | 0.91  | 32 | 0.37    |

(C)

| Offspring trait | Variable                                 | b            | SE          | t            | df          | P-value       |
|-----------------|------------------------------------------|--------------|-------------|--------------|-------------|---------------|
| Liver PC1       | <b>Intercept (2015, Control, Female)</b> | <b>-1.02</b> | <b>0.38</b> | <b>-2.71</b> | <b>12.4</b> | <b>0.018</b>  |
|                 | Year (2016)                              | 0.60         | 0.41        | 1.48         | 12.1        | 0.16          |
|                 | <b>Year (2017)</b>                       | <b>1.76</b>  | <b>0.38</b> | <b>4.63</b>  | <b>12.1</b> | <b>0.0006</b> |
|                 | Sex (Male)                               | 0.02         | 0.24        | 0.09         | 28.7        | 0.93          |
|                 | Birth date                               | 0.04         | 0.16        | 0.25         | 18.0        | 0.81          |
|                 | Growth                                   | -0.21        | 0.18        | -1.14        | 18.6        | 0.27          |
|                 | Litter size                              | 0.09         | 0.15        | 0.57         | 17.3        | 0.57          |
|                 | Treatment (GCs)                          | -0.28        | 0.27        | -1.02        | 14.6        | 0.32          |
|                 | Treatment (GCs) x Growth                 | -0.07        | 0.31        | -0.24        | 16.3        | 0.81          |

35 Results from 41 offspring from 26 litters over 3 years.



36 **Table S4. Effects of treating female red squirrels with GCs during (A) pregnancy or (B)**  
 37 **lactation on liver telomere lengths (kb) of weaned offspring.** Telomeres measured in DNA  
 38 from liver tissue using the TRF method. Models contained random intercept term for litter  
 39 identity (pregnancy:  $\sigma^2 = 0.96$ ; lactation:  $\sigma^2 = 6.7$ ).  
 40

(A)

| Treatment Period | Variable                                 | b            | SE          | t           | df          | P-value           |
|------------------|------------------------------------------|--------------|-------------|-------------|-------------|-------------------|
| <b>Pregnancy</b> | <b>Intercept (2015, Control, Female)</b> | <b>20.59</b> | <b>1.40</b> | <b>14.7</b> | <b>15.5</b> | <b>&lt;0.0001</b> |
|                  | <b>Year (2016)</b>                       | <b>3.69</b>  | <b>1.41</b> | <b>2.61</b> | <b>13.0</b> | <b>0.022</b>      |
|                  | Year (2017)                              | -3.07        | 1.63        | -1.88       | 19.0        | 0.076             |
|                  | Sex (Male)                               | 0.33         | 0.76        | 0.43        | 26.4        | 0.67              |
|                  | Birth date                               | 0.54         | 0.54        | 1.01        | 18.2        | 0.32              |
|                  | Growth                                   | -0.30        | 0.62        | -0.49       | 20.7        | 0.63              |
|                  | Litter size                              | -0.39        | 0.51        | -0.76       | 17.7        | 0.45              |
|                  | Liver PC1                                | 0.23         | 0.57        | 0.41        | 30.8        | 0.69              |
|                  | Treatment (GCs)                          | 0.42         | 0.92        | 0.45        | 15.5        | 0.65              |
|                  | Treatment (GCs) x Growth                 | 1.18         | 1.04        | 1.14        | 17.5        | 0.27              |

Results based upon 41 offspring from 26 litters across 3 years

(B)

| Treatment Period | Variable                                 | b            | SE          | t           | df          | P-value           |
|------------------|------------------------------------------|--------------|-------------|-------------|-------------|-------------------|
| <b>Lactation</b> | <b>Intercept (2015, Control, Female)</b> | <b>19.03</b> | <b>1.97</b> | <b>9.67</b> | <b>14.9</b> | <b>&lt;0.0001</b> |
|                  | Year (2016)                              | 2.88         | 2.61        | 1.10        | 11.5        | 0.29              |
|                  | Year (2017)                              | 0.29         | 2.68        | 0.11        | 15.8        | 0.91              |
|                  | Sex (Male)                               | 0.12         | 1.04        | 0.11        | 11.1        | 0.91              |
|                  | Birth date                               | -0.09        | 1.24        | -0.07       | 12.1        | 0.94              |
|                  | Growth                                   | -0.08        | 0.86        | -0.09       | 16.6        | 0.93              |
|                  | Litter size                              | 0.57         | 1.52        | 0.37        | 11.9        | 0.71              |
|                  | Liver PC1                                | -0.41        | 0.85        | -0.48       | 16.2        | 0.64              |
|                  | Treatment (GCs)                          | 0.52         | 1.49        | 0.35        | 11.3        | 0.73              |
|                  | Treatment (GCs) x Growth                 | 1.03         | 1.17        | 0.88        | 14.1        | 0.39              |

Results based upon 27 offspring from 18 litters across 3 years

41  
 42  
 43  
 44  
 45  
 46  
 47  
 48  
 49  
 50  
 51  
 52

53 **Table S5. Effects of treating lactating red squirrels with GCs on oxidative stress levels in**  
 54 **(A) blood, (B) heart, and (C) liver tissue from weaned offspring.** High PC scores correspond  
 55 to low levels of antioxidants and, in heart tissue, higher levels of protein damage (Table 1). The  
 56 model for liver contained a random intercept term for litter identity (liver:  $\sigma^2 = 0.33$ ).  
 57

| (A) | Offspring trait  | Variable                          | b     | SE   | t     | df | P-value |
|-----|------------------|-----------------------------------|-------|------|-------|----|---------|
|     | <b>Blood PC2</b> | Intercept (2015, Control, Female) | 0.21  | 0.52 | 0.40  | 18 | 0.69    |
|     |                  | Year (2016)                       | -0.16 | 0.73 | -0.22 | 18 | 0.83    |
|     |                  | Year (2017)                       | -0.56 | 0.57 | -0.99 | 18 | 0.34    |
|     |                  | Sex (Male)                        | -0.53 | 0.49 | -1.06 | 18 | 0.30    |
|     |                  | Birth date                        | -0.23 | 0.39 | -0.59 | 18 | 0.56    |
|     |                  | Growth                            | 0.39  | 0.33 | 1.17  | 18 | 0.26    |
|     |                  | Litter size                       | -0.42 | 0.46 | -0.92 | 18 | 0.37    |
|     |                  | Treatment (GCs)                   | 0.44  | 0.44 | 1.01  | 18 | 0.32    |
|     |                  | Treatment (GCs) x Growth          | -0.29 | 0.47 | -0.62 | 18 | 0.54    |

  

| (B) | Offspring trait  | Variable                                 | b            | SE          | t            | df        | P-value      |
|-----|------------------|------------------------------------------|--------------|-------------|--------------|-----------|--------------|
|     | <b>Heart PC2</b> | <b>Intercept (2015, Control, Female)</b> | <b>-1.14</b> | <b>0.41</b> | <b>-2.78</b> | <b>18</b> | <b>0.012</b> |
|     |                  | Year (2016)                              | 0.55         | 0.57        | 0.97         | 18        | 0.35         |
|     |                  | Year (2017)                              | 0.84         | 0.44        | 1.87         | 18        | 0.08         |
|     |                  | Sex (Male)                               | 0.36         | 0.39        | 0.92         | 18        | 0.37         |
|     |                  | Birth date                               | 0.23         | 0.31        | 0.76         | 18        | 0.46         |
|     |                  | Growth                                   | -0.09        | 0.26        | -0.36        | 18        | 0.72         |
|     |                  | Litter size                              | 0.27         | 0.36        | 0.74         | 18        | 0.47         |
|     |                  | Treatment (GCs)                          | 0.58         | 0.34        | 1.68         | 18        | 0.11         |
|     |                  | Treatment (GCs) x Growth                 | -0.16        | 0.37        | -0.44        | 18        | 0.66         |

  

| (C) | Offspring trait  | Variable                                 | b            | SE          | t            | df          | P-value       |
|-----|------------------|------------------------------------------|--------------|-------------|--------------|-------------|---------------|
|     | <b>Liver PC1</b> | <b>Intercept (2015, Control, Female)</b> | <b>-1.35</b> | <b>0.40</b> | <b>-3.38</b> | <b>11.9</b> | <b>0.005</b>  |
|     |                  | Year (2016)                              | 0.71         | 0.62        | 1.14         | 9.6         | 0.28          |
|     |                  | <b>Year (2017)</b>                       | <b>2.24</b>  | <b>0.47</b> | <b>4.81</b>  | <b>9.9</b>  | <b>0.0007</b> |
|     |                  | Sex (Male)                               | 0.12         | 0.31        | 0.40         | 14.1        | 0.69          |
|     |                  | Birth date                               | -0.18        | 0.31        | -0.59        | 11.4        | 0.57          |
|     |                  | Growth                                   | -0.29        | 0.23        | -1.25        | 17.6        | 0.22          |
|     |                  | Litter size                              | -0.35        | 0.37        | -0.93        | 10.7        | 0.37          |
|     |                  | Treatment (GCs)                          | -0.12        | 0.37        | -0.32        | 10.1        | 0.75          |
|     |                  | Treatment (GCs) x Growth                 | -0.13        | 0.33        | -0.40        | 17.9        | 0.69          |

Results from 27 offspring from 18 litters over 3 years.

58  
 59  
 60
